# Supplementary material for: Сельское хозяйство Венгрии в условиях евроинтеграции
Source: Frontiers journal article supplement (doi:10.3389/fphar.2021.647084), 2014-01-01
Supplement: downloadfile [file 647084]

## Sheet: rat-mouse-human_homologous
rat	mouse	human
ENSRNOG00000000007	ENSMUSG00000070880	GAD1
ENSRNOG00000000008	ENSMUSG00000040310	ALX4
ENSRNOG00000000010	ENSMUSG00000031654	CBLN1
ENSRNOG00000000012	ENSMUSG00000068079	TCF15
ENSRNOG00000000017	ENSMUSG00000015652	STEAP1
ENSRNOG00000000024	ENSMUSG00000042770	HEBP1
ENSRNOG00000000033	ENSMUSG00000042066	TMCC2
ENSRNOG00000000034	ENSMUSG00000009772	NUAK2
ENSRNOG00000000036	ENSMUSG00000042115	KLHDC8A
ENSRNOG00000000040	ENSMUSG00000033722	KIAA1614
ENSRNOG00000000041	ENSMUSG00000046959	SLC26A1
ENSRNOG00000000042	ENSMUSG00000026469	XPR1
ENSRNOG00000000043	ENSMUSG00000033540	IDUA
ENSRNOG00000000044	ENSMUSG00000013495	TMEM175
ENSRNOG00000000047	ENSMUSG00000027215	CD82
ENSRNOG00000000048	ENSMUSG00000062234	GAK
ENSRNOG00000000054	ENSMUSG00000007950	ABHD8
ENSRNOG00000000055	ENSMUSG00000070504	FCRL6
ENSRNOG00000000060	ENSMUSG00000033615	CPLX1
ENSRNOG00000000062	ENSMUSG00000033623	PCGF3
ENSRNOG00000000065	ENSMUSG00000029491	PDE6B
ENSRNOG00000000066	ENSMUSG00000047539	FBXO28
ENSRNOG00000000068	ENSMUSG00000026626	PPP2R5A
ENSRNOG00000000070	ENSMUSG00000029265	DR1
ENSRNOG00000000073	ENSMUSG00000063406	TMED5
ENSRNOG00000000075	ENSMUSG00000029267	MTF2
ENSRNOG00000000081	ENSMUSG00000029338	ANTXR2
ENSRNOG00000000082	ENSMUSG00000002428	HLTF
ENSRNOG00000000095	ENSMUSG00000028096	GPR89B
ENSRNOG00000000096	ENSMUSG00000038298	PDZK1
ENSRNOG00000000097	ENSMUSG00000038304	CD160
ENSRNOG00000000098	ENSMUSG00000028098	RNF115
ENSRNOG00000000104	ENSMUSG00000025872	THOC3
ENSRNOG00000000105	ENSMUSG00000025867	CPLX2
ENSRNOG00000000108	ENSMUSG00000031521	AGA
ENSRNOG00000000109	ENSMUSG00000031603	FGF20
ENSRNOG00000000111	ENSMUSG00000031458	COPRS
ENSRNOG00000000112	ENSMUSG00000047710	CHAMP1
ENSRNOG00000000113	ENSMUSG00000036941	ELAC1
ENSRNOG00000000121	ENSMUSG00000043257	PIGV
ENSRNOG00000000122	ENSMUSG00000028792	AK2
ENSRNOG00000000123	ENSMUSG00000028793	RNF19B
ENSRNOG00000000127	ENSMUSG00000003731	KPNA6
ENSRNOG00000000129	ENSMUSG00000036062	PHF24
ENSRNOG00000000130	ENSMUSG00000036052	DNAJB5
ENSRNOG00000000133	ENSMUSG00000021497	TXNDC15
ENSRNOG00000000137	ENSMUSG00000021423	LY86
ENSRNOG00000000138	ENSMUSG00000034762	GLIS1
ENSRNOG00000000142	ENSMUSG00000026748	PLXDC2
ENSRNOG00000000145	ENSMUSG00000028698	PIK3R3
ENSRNOG00000000150	ENSMUSG00000026740	DNAJC1
ENSRNOG00000000151	ENSMUSG00000037295	LDLRAP1
ENSRNOG00000000155	ENSMUSG00000034893	COG3
ENSRNOG00000000156	ENSMUSG00000057751	MEGF6
ENSRNOG00000000157	ENSMUSG00000032905	ATG12
ENSRNOG00000000158	ENSMUSG00000033022	CDO1
ENSRNOG00000000161	ENSMUSG00000025531	CHM
ENSRNOG00000000164	ENSMUSG00000016534	LAMP2
ENSRNOG00000000165	ENSMUSG00000025271	PFKFB1
ENSRNOG00000000166	ENSMUSG00000025269	APEX2
ENSRNOG00000000167	ENSMUSG00000025270	ALAS2
ENSRNOG00000000168	ENSMUSG00000027199	GATM
ENSRNOG00000000170	ENSMUSG00000005802	SLC30A4
ENSRNOG00000000175	ENSMUSG00000042570	MIER2
ENSRNOG00000000177	ENSMUSG00000052151	PLPP2
ENSRNOG00000000184	ENSMUSG00000016942	TMPRSS6
ENSRNOG00000000185	ENSMUSG00000071711	MPST
ENSRNOG00000000186	ENSMUSG00000044986	TST
ENSRNOG00000000187	ENSMUSG00000071713	CSF2RB
ENSRNOG00000000190	ENSMUSG00000055024	EP300
ENSRNOG00000000195	ENSMUSG00000023186	VWA5A
ENSRNOG00000000196	ENSMUSG00000032274	CYP19A1
ENSRNOG00000000199	ENSMUSG00000060461	DPPA5
ENSRNOG00000000204	ENSMUSG00000032423	SYNCRIP
ENSRNOG00000000219	ENSMUSG00000037949	ANO10
ENSRNOG00000000221	ENSMUSG00000032540	ABHD5
ENSRNOG00000000230	ENSMUSG00000002279	LMF1
ENSRNOG00000000231	ENSMUSG00000033287	KCTD17
ENSRNOG00000000233	ENSMUSG00000000617	GRM6
ENSRNOG00000000236	ENSMUSG00000017421	ZNF207
ENSRNOG00000000237	ENSMUSG00000057181	C17orf75
ENSRNOG00000000239	ENSMUSG00000035373	CCL7
ENSRNOG00000000244	ENSMUSG00000033983	COIL
ENSRNOG00000000245	ENSMUSG00000041920	SLC16A6
ENSRNOG00000000246	ENSMUSG00000020610	AMZ2
ENSRNOG00000000247	ENSMUSG00000020818	MFSD11
ENSRNOG00000000248	ENSMUSG00000034120	SRSF2
ENSRNOG00000000249	ENSMUSG00000090266	METTL23
ENSRNOG00000000250	ENSMUSG00000056962	JMJD6
ENSRNOG00000000251	ENSMUSG00000009588	ST6GALNAC1
ENSRNOG00000000257	ENSMUSG00000031906	SMPD3
ENSRNOG00000000258	ENSMUSG00000060098	PRMT7
ENSRNOG00000000262	ENSMUSG00000031728	ZNF821
ENSRNOG00000000264	ENSMUSG00000001482	DEF8
ENSRNOG00000000274	ENSMUSG00000037747	PHYHIPL
ENSRNOG00000000275	ENSMUSG00000043259	FAM13C
ENSRNOG00000000277	ENSMUSG00000047146	TET1
ENSRNOG00000000279	ENSMUSG00000019864	RTN4IP1
ENSRNOG00000000281	ENSMUSG00000003526	PRODH
ENSRNOG00000000282	ENSMUSG00000022738	GSC2
ENSRNOG00000000288	ENSMUSG00000012017	SCARF2
ENSRNOG00000000299	ENSMUSG00000048756	FOXO3
ENSRNOG00000000302	ENSMUSG00000038332	SESN1
ENSRNOG00000000303	ENSMUSG00000019813	CEP57L1
ENSRNOG00000000304	ENSMUSG00000019818	CD164
ENSRNOG00000000306	ENSMUSG00000019822	SMPD2
ENSRNOG00000000307	ENSMUSG00000019823	MICAL1
ENSRNOG00000000308	ENSMUSG00000019826	ZBTB24
ENSRNOG00000000312	ENSMUSG00000038417	FIG4
ENSRNOG00000000314	ENSMUSG00000019802	SEC63
ENSRNOG00000000316	ENSMUSG00000038248	SOBP
ENSRNOG00000000320	ENSMUSG00000089847	TIMM10B
ENSRNOG00000000322	ENSMUSG00000038160	ATG5
ENSRNOG00000000323	ENSMUSG00000038151	PRDM1
ENSRNOG00000000327	ENSMUSG00000038822	HACE1
ENSRNOG00000000335	ENSMUSG00000028644	ERMAP
ENSRNOG00000000341	ENSMUSG00000021806	NID2
ENSRNOG00000000368	ENSMUSG00000056073	GRIK2
ENSRNOG00000000373	ENSMUSG00000060843	CTNNA3
ENSRNOG00000000376	ENSMUSG00000068732	TMEM167B
ENSRNOG00000000383	ENSMUSG00000020067	MYPN
ENSRNOG00000000384	ENSMUSG00000036816	ATOH7
ENSRNOG00000000387	ENSMUSG00000036875	DNA2
ENSRNOG00000000390	ENSMUSG00000020070	RUFY2
ENSRNOG00000000392	ENSMUSG00000020079	SUPV3L1
ENSRNOG00000000394	ENSMUSG00000020077	SRGN
ENSRNOG00000000396	ENSMUSG00000020076	DDX50
ENSRNOG00000000397	ENSMUSG00000020074	CCAR1
ENSRNOG00000000401	ENSMUSG00000019905	GPRC6A
ENSRNOG00000000405	ENSMUSG00000049641	VGLL2
ENSRNOG00000000406	ENSMUSG00000019893	ROS1
ENSRNOG00000000407	ENSMUSG00000019891	DCBLD1
ENSRNOG00000000408	ENSMUSG00000019861	GOPC
ENSRNOG00000000411	ENSMUSG00000023068	NUS1
ENSRNOG00000000412	ENSMUSG00000038602	SLC35F1
ENSRNOG00000000413	ENSMUSG00000038583	PLN
ENSRNOG00000000414	ENSMUSG00000038594	CEP85L
ENSRNOG00000000415	ENSMUSG00000019857	ASF1A
ENSRNOG00000000417	ENSMUSG00000066306	NUMA1
ENSRNOG00000000418	ENSMUSG00000049823	ZBTB12
ENSRNOG00000000419	ENSMUSG00000090231	CFB
ENSRNOG00000000420	ENSMUSG00000024369	NELFE
ENSRNOG00000000421	ENSMUSG00000040356	SKIV2L
ENSRNOG00000000422	ENSMUSG00000040482	DXO
ENSRNOG00000000428	ENSMUSG00000024365	CYP21A2
ENSRNOG00000000431	ENSMUSG00000015461	ATF6B
ENSRNOG00000000432	ENSMUSG00000033739	FKBPL
ENSRNOG00000000433	ENSMUSG00000015476	PRRT1
ENSRNOG00000000435	ENSMUSG00000015474	PPT2
ENSRNOG00000000436	ENSMUSG00000015467	EGFL8
ENSRNOG00000000437	ENSMUSG00000034254	AGPAT1
ENSRNOG00000000438	ENSMUSG00000015478	RNF5
ENSRNOG00000000439	ENSMUSG00000015452	AGER
ENSRNOG00000000440	ENSMUSG00000034673	PBX2
ENSRNOG00000000441	ENSMUSG00000034786	GPSM3
ENSRNOG00000000443	ENSMUSG00000073418	C4B
ENSRNOG00000000454	ENSMUSG00000041538	HLA-DOB
ENSRNOG00000000455	ENSMUSG00000024339	TAP2
ENSRNOG00000000456	ENSMUSG00000024338	PSMB8
ENSRNOG00000000457	ENSMUSG00000037321	TAP1
ENSRNOG00000000459	ENSMUSG00000096727	PSMB9
ENSRNOG00000000461	ENSMUSG00000024335	BRD2
ENSRNOG00000000463	ENSMUSG00000024330	COL11A2
ENSRNOG00000000464	ENSMUSG00000039656	RXRB
ENSRNOG00000000465	ENSMUSG00000024327	SLC39A7
ENSRNOG00000000466	ENSMUSG00000073422	HSD17B8
ENSRNOG00000000467	ENSMUSG00000024325	RING1
ENSRNOG00000000470	ENSMUSG00000024319	VPS52
ENSRNOG00000000471	ENSMUSG00000067370	B3GALT4
ENSRNOG00000000473	ENSMUSG00000024309	PFDN6
ENSRNOG00000000474	ENSMUSG00000041354	RGL2
ENSRNOG00000000476	ENSMUSG00000051390	ZBTB22
ENSRNOG00000000477	ENSMUSG00000002307	DAXX
ENSRNOG00000000479	ENSMUSG00000024301	KIFC1
ENSRNOG00000000480	ENSMUSG00000024193	PHF1
ENSRNOG00000000481	ENSMUSG00000024194	CUTA
ENSRNOG00000000483	ENSMUSG00000067629	SYNGAP1
ENSRNOG00000000485	ENSMUSG00000057789	BAK1
ENSRNOG00000000488	ENSMUSG00000046711	HMGA1
ENSRNOG00000000491	ENSMUSG00000024215	SPDEF
ENSRNOG00000000493	ENSMUSG00000024217	SNRPC
ENSRNOG00000000495	ENSMUSG00000039512	UHRF1BP1
ENSRNOG00000000498	ENSMUSG00000024219	ANKS1A
ENSRNOG00000000499	ENSMUSG00000062859	TCP11
ENSRNOG00000000500	ENSMUSG00000038677	SCUBE3
ENSRNOG00000000501	ENSMUSG00000024220	ZNF76
ENSRNOG00000000502	ENSMUSG00000002257	DEF6
ENSRNOG00000000503	ENSMUSG00000002250	PPARD
ENSRNOG00000000504	ENSMUSG00000007570	FANCE
ENSRNOG00000000505	ENSMUSG00000037805	RPL10A
ENSRNOG00000000506	ENSMUSG00000002249	TEAD3
ENSRNOG00000000507	ENSMUSG00000037446	TULP1
ENSRNOG00000000508	ENSMUSG00000024223	ARMC12
ENSRNOG00000000510	ENSMUSG00000024225	CLPS
ENSRNOG00000000511	ENSMUSG00000004865	SRPK1
ENSRNOG00000000512	ENSMUSG00000036196	SLC26A8
ENSRNOG00000000513	ENSMUSG00000053436	MAPK14
ENSRNOG00000000515	ENSMUSG00000004864	MAPK13
ENSRNOG00000000516	ENSMUSG00000045378	PXT1
ENSRNOG00000000517	ENSMUSG00000005936	KCTD20
ENSRNOG00000000519	ENSMUSG00000024006	STK38
ENSRNOG00000000520	ENSMUSG00000071172	SRSF3
ENSRNOG00000000521	ENSMUSG00000023067	CDKN1A
ENSRNOG00000000522	ENSMUSG00000024008	CPNE5
ENSRNOG00000000523	ENSMUSG00000024007	PPIL1
ENSRNOG00000000524	ENSMUSG00000052712	C6orf89
ENSRNOG00000000525	ENSMUSG00000024011	PI16
ENSRNOG00000000527	ENSMUSG00000024012	MTCH1
ENSRNOG00000000528	ENSMUSG00000024013	FGD2
ENSRNOG00000000529	ENSMUSG00000024014	PIM1
ENSRNOG00000000531	ENSMUSG00000024018	CCDC167
ENSRNOG00000000532	ENSMUSG00000024019	CMTR1
ENSRNOG00000000536	ENSMUSG00000043557	MDGA1
ENSRNOG00000000540	ENSMUSG00000062202	BTBD9
ENSRNOG00000000541	ENSMUSG00000024026	GLO1
ENSRNOG00000000542	ENSMUSG00000033826	DNAH8
ENSRNOG00000000543	ENSMUSG00000019779	FRK
ENSRNOG00000000546	ENSMUSG00000039480	NT5DC1
ENSRNOG00000000547	ENSMUSG00000039485	TSPYL4
ENSRNOG00000000549	ENSMUSG00000047514	TSPYL1
ENSRNOG00000000552	ENSMUSG00000058806	COL13A1
ENSRNOG00000000556	ENSMUSG00000037171	NODAL
ENSRNOG00000000557	ENSMUSG00000020089	PPA1
ENSRNOG00000000559	ENSMUSG00000020090	NPFFR1
ENSRNOG00000000560	ENSMUSG00000037151	LRRC20
ENSRNOG00000000561	ENSMUSG00000020092	PALD1
ENSRNOG00000000562	ENSMUSG00000037202	PRF1
ENSRNOG00000000563	ENSMUSG00000059901	ADAMTS14
ENSRNOG00000000564	ENSMUSG00000020096	TBATA
ENSRNOG00000000565	ENSMUSG00000020097	SGPL1
ENSRNOG00000000566	ENSMUSG00000020098	PCBD1
ENSRNOG00000000567	ENSMUSG00000020099	UNC5B
ENSRNOG00000000568	ENSMUSG00000020100	SLC29A3
ENSRNOG00000000571	ENSMUSG00000004207	PSAP
ENSRNOG00000000572	ENSMUSG00000057337	CHST3
ENSRNOG00000000574	ENSMUSG00000079941	COX5B
ENSRNOG00000000576	ENSMUSG00000020107	ANAPC16
ENSRNOG00000000579	ENSMUSG00000069662	MARCKS
ENSRNOG00000000581	ENSMUSG00000038446	CDC40
ENSRNOG00000000582	ENSMUSG00000063428	DDO
ENSRNOG00000000583	ENSMUSG00000038481	CDK19
ENSRNOG00000000585	ENSMUSG00000063953	AMD1
ENSRNOG00000000586	ENSMUSG00000019837	GTF3C6
ENSRNOG00000000587	ENSMUSG00000038510	RPF2
ENSRNOG00000000588	ENSMUSG00000019838	SLC16A10
ENSRNOG00000000589	ENSMUSG00000038522	MFSD4B
ENSRNOG00000000590	ENSMUSG00000038528	MFSD4B
ENSRNOG00000000593	ENSMUSG00000019841	REV3L
ENSRNOG00000000595	ENSMUSG00000019842	TRAF3IP2
ENSRNOG00000000596	ENSMUSG00000019843	FYN
ENSRNOG00000000598	ENSMUSG00000019845	TUBE1
ENSRNOG00000000599	ENSMUSG00000019846	LAMA4
ENSRNOG00000000604	ENSMUSG00000019777	HDAC2
ENSRNOG00000000605	ENSMUSG00000044499	HS3ST5
ENSRNOG00000000606	ENSMUSG00000052613	PCDH15
ENSRNOG00000000609	ENSMUSG00000060733	IPMK
ENSRNOG00000000610	ENSMUSG00000037710	CISD1
ENSRNOG00000000611	ENSMUSG00000019927	UBE2D1
ENSRNOG00000000613	ENSMUSG00000003923	TFAM
ENSRNOG00000000614	ENSMUSG00000014329	BICC1
ENSRNOG00000000618	ENSMUSG00000034912	MDGA2
ENSRNOG00000000622	ENSMUSG00000020267	HINT1
ENSRNOG00000000630	ENSMUSG00000014075	TCTEX1D2
ENSRNOG00000000632	ENSMUSG00000019942	CDK1
ENSRNOG00000000633	ENSMUSG00000019944	RHOBTB1
ENSRNOG00000000636	ENSMUSG00000037846	RTKN2
ENSRNOG00000000638	ENSMUSG00000037855	ZNF365
ENSRNOG00000000640	ENSMUSG00000037868	EGR2
ENSRNOG00000000641	ENSMUSG00000075000	NRBF2
ENSRNOG00000000645	ENSMUSG00000019873	REEP3
ENSRNOG00000000648	ENSMUSG00000037876	JMJD1C
ENSRNOG00000000653	ENSMUSG00000026398	NR5A2
ENSRNOG00000000655	ENSMUSG00000026395	PTPRC
ENSRNOG00000000657	ENSMUSG00000026393	NEK7
ENSRNOG00000000658	ENSMUSG00000042010	ACACB
ENSRNOG00000000661	ENSMUSG00000042328	HPS4
ENSRNOG00000000662	ENSMUSG00000029346	SRRD
ENSRNOG00000000663	ENSMUSG00000029345	TFIP11
ENSRNOG00000000664	ENSMUSG00000029344	TPST2
ENSRNOG00000000665	ENSMUSG00000050017	PITPNB
ENSRNOG00000000691	ENSMUSG00000042002	FOXN4
ENSRNOG00000000692	ENSMUSG00000029591	UNG
ENSRNOG00000000693	ENSMUSG00000042078	SVOP
ENSRNOG00000000695	ENSMUSG00000042121	SSH1
ENSRNOG00000000697	ENSMUSG00000004530	CORO1C
ENSRNOG00000000699	ENSMUSG00000048163	SELPLG
ENSRNOG00000000700	ENSMUSG00000054675	TMEM119
ENSRNOG00000000701	ENSMUSG00000025825	ISCU
ENSRNOG00000000702	ENSMUSG00000018974	SART3
ENSRNOG00000000704	ENSMUSG00000042190	CMKLR1
ENSRNOG00000000708	ENSMUSG00000042216	SGSM1
ENSRNOG00000000715	ENSMUSG00000004842	POU1F1
ENSRNOG00000000716	ENSMUSG00000050783	HTR1F
ENSRNOG00000000718	ENSMUSG00000054604	CGGBP1
ENSRNOG00000000720	ENSMUSG00000059920	C3orf38
ENSRNOG00000000726	ENSMUSG00000054940	OR2J2
ENSRNOG00000000729	ENSMUSG00000079834	TMLHE
ENSRNOG00000000749	ENSMUSG00000050613	OR14J1
ENSRNOG00000000759	ENSMUSG00000090675	OR5V1
ENSRNOG00000000765	ENSMUSG00000064121	OR11A1
ENSRNOG00000000768	ENSMUSG00000035186	UBD
ENSRNOG00000000774	ENSMUSG00000024462	GABBR1
ENSRNOG00000000775	ENSMUSG00000076439	MOG
ENSRNOG00000000779	ENSMUSG00000036315	ZNRD1
ENSRNOG00000000780	ENSMUSG00000036398	PPP1R11
ENSRNOG00000000781	ENSMUSG00000036492	RNF39
ENSRNOG00000000782	ENSMUSG00000073400	TRIM10
ENSRNOG00000000783	ENSMUSG00000073399	TRIM40
ENSRNOG00000000785	ENSMUSG00000045409	TRIM39
ENSRNOG00000000786	ENSMUSG00000024446	RPP21
ENSRNOG00000000796	ENSMUSG00000003226	RANBP2
ENSRNOG00000000798	ENSMUSG00000024429	GNL1
ENSRNOG00000000799	ENSMUSG00000038762	ABCF1
ENSRNOG00000000800	ENSMUSG00000003746	MAN1A1
ENSRNOG00000000802	ENSMUSG00000038122	TBC1D32
ENSRNOG00000000804	ENSMUSG00000024436	MRPS18B
ENSRNOG00000000805	ENSMUSG00000050953	GJA1
ENSRNOG00000000808	ENSMUSG00000019878	HSF2
ENSRNOG00000000809	ENSMUSG00000024426	ATAT1
ENSRNOG00000000811	ENSMUSG00000019876	PKIB
ENSRNOG00000000812	ENSMUSG00000050705	C6orf136
ENSRNOG00000000814	ENSMUSG00000019874	FABP7
ENSRNOG00000000815	ENSMUSG00000019872	SMPDL3A
ENSRNOG00000000816	ENSMUSG00000034595	PPP1R18
ENSRNOG00000000818	ENSMUSG00000059791	NRM
ENSRNOG00000000823	ENSMUSG00000038039	GCC2
ENSRNOG00000000824	ENSMUSG00000039497	DSE
ENSRNOG00000000826	ENSMUSG00000059714	FLOT1
ENSRNOG00000000827	ENSMUSG00000003541	IER3
ENSRNOG00000000831	ENSMUSG00000001524	GTF2H4
ENSRNOG00000000833	ENSMUSG00000038838	VARS2
ENSRNOG00000000836	ENSMUSG00000024399	LTB
ENSRNOG00000000837	ENSMUSG00000024401	TNF
ENSRNOG00000000838	ENSMUSG00000024402	LTA
ENSRNOG00000000839	ENSMUSG00000042419	NFKBIL1
ENSRNOG00000000840	ENSMUSG00000024403	ATP6V1G2
ENSRNOG00000000841	ENSMUSG00000019432	DDX39B
ENSRNOG00000000842	ENSMUSG00000007039	DDAH2
ENSRNOG00000000843	ENSMUSG00000092586	LY6G6C
ENSRNOG00000000844	ENSMUSG00000073413	LY6G6D
ENSRNOG00000000846	ENSMUSG00000034482	LY6G5C
ENSRNOG00000000847	ENSMUSG00000024387	CSNK2B
ENSRNOG00000000848	ENSMUSG00000092417	GPANK1
ENSRNOG00000000850	ENSMUSG00000024391	APOM
ENSRNOG00000000851	ENSMUSG00000024392	BAG6
ENSRNOG00000000852	ENSMUSG00000024393	PRRC2A
ENSRNOG00000000853	ENSMUSG00000024397	AIF1
ENSRNOG00000000855	ENSMUSG00000073412	LST1
ENSRNOG00000000857	ENSMUSG00000007035	MSH5
ENSRNOG00000000858	ENSMUSG00000036185	SAPCD1
ENSRNOG00000000860	ENSMUSG00000007030	VWA7
ENSRNOG00000000861	ENSMUSG00000067860	ZIC3
ENSRNOG00000000869	ENSMUSG00000031133	ARHGEF6
ENSRNOG00000000871	ENSMUSG00000031132	CD40LG
ENSRNOG00000000873	ENSMUSG00000031130	BRS3
ENSRNOG00000000875	ENSMUSG00000023092	FHL1
ENSRNOG00000000878	ENSMUSG00000007034	SLC44A4
ENSRNOG00000000879	ENSMUSG00000060681	SLC9A6
ENSRNOG00000000881	ENSMUSG00000061273	MMGT1
ENSRNOG00000000885	ENSMUSG00000029673	AUTS2
ENSRNOG00000000886	ENSMUSG00000060371	CALN1
ENSRNOG00000000888	ENSMUSG00000025337	SBDS
ENSRNOG00000000889	ENSMUSG00000024096	RALBP1
ENSRNOG00000000893	ENSMUSG00000053094	TMEM248
ENSRNOG00000000894	ENSMUSG00000056602	FRY
ENSRNOG00000000895	ENSMUSG00000025340	RABGEF1
ENSRNOG00000000897	ENSMUSG00000053368	RXFP2
ENSRNOG00000000900	ENSMUSG00000034118	TPST1
ENSRNOG00000000901	ENSMUSG00000025532	CRCP
ENSRNOG00000000902	ENSMUSG00000029657	HSPH1
ENSRNOG00000000903	ENSMUSG00000025533	ASL
ENSRNOG00000000905	ENSMUSG00000029660	TEX26
ENSRNOG00000000906	ENSMUSG00000029659	MEDAG
ENSRNOG00000000907	ENSMUSG00000060063	ALOX5AP
ENSRNOG00000000909	ENSMUSG00000041264	USPL1
ENSRNOG00000000913	ENSMUSG00000025534	GUSB
ENSRNOG00000000916	ENSMUSG00000041298	KATNAL1
ENSRNOG00000000917	ENSMUSG00000095789	NUPR2
ENSRNOG00000000918	ENSMUSG00000034173	ZBED9
ENSRNOG00000000920	ENSMUSG00000025537	PHKG1
ENSRNOG00000000921	ENSMUSG00000001687	UBL3
ENSRNOG00000000923	ENSMUSG00000029447	CCT6A
ENSRNOG00000000924	ENSMUSG00000041313	SLC7A1
ENSRNOG00000000925	ENSMUSG00000029446	PSPH
ENSRNOG00000000926	ENSMUSG00000034211	MRPS17
ENSRNOG00000000931	ENSMUSG00000029439	SFSWAP
ENSRNOG00000000934	ENSMUSG00000029423	PIWIL1
ENSRNOG00000000936	ENSMUSG00000029428	STX2
ENSRNOG00000000937	ENSMUSG00000029650	SLC46A3
ENSRNOG00000000938	ENSMUSG00000029430	RAN
ENSRNOG00000000940	ENSMUSG00000029648	FLT1
ENSRNOG00000000942	ENSMUSG00000029647	PAN3
ENSRNOG00000000952	ENSMUSG00000053129	GSX1
ENSRNOG00000000955	ENSMUSG00000016520	LNX2
ENSRNOG00000000956	ENSMUSG00000029641	RASL11A
ENSRNOG00000000961	ENSMUSG00000049971	GLT1D1
ENSRNOG00000000962	ENSMUSG00000029416	SLC15A4
ENSRNOG00000000963	ENSMUSG00000034324	TMEM132C
ENSRNOG00000000967	ENSMUSG00000029482	AACS
ENSRNOG00000000968	ENSMUSG00000029634	RNF6
ENSRNOG00000000974	ENSMUSG00000047264	ZNF358
ENSRNOG00000000975	ENSMUSG00000004567	MCOLN1
ENSRNOG00000000977	ENSMUSG00000004565	PNPLA6
ENSRNOG00000000979	ENSMUSG00000037905	BRI3BP
ENSRNOG00000000981	ENSMUSG00000037936	SCARB1
ENSRNOG00000000983	ENSMUSG00000029627	ZNF394
ENSRNOG00000000985	ENSMUSG00000029625	CPSF4
ENSRNOG00000000986	ENSMUSG00000044433	CAMSAP3
ENSRNOG00000000987	ENSMUSG00000029624	PTCD1
ENSRNOG00000000988	ENSMUSG00000019470	XAB2
ENSRNOG00000000989	ENSMUSG00000038722	BUD31
ENSRNOG00000000990	ENSMUSG00000029623	PDAP1
ENSRNOG00000000991	ENSMUSG00000029622	ARPC1B
ENSRNOG00000000993	ENSMUSG00000004630	PCP2
ENSRNOG00000000994	ENSMUSG00000004626	STXBP2
ENSRNOG00000000996	ENSMUSG00000029621	ARPC1A
ENSRNOG00000000999	ENSMUSG00000038780	SMURF1
ENSRNOG00000001001	ENSMUSG00000012705	RETN
ENSRNOG00000001003	ENSMUSG00000040236	TRAPPC5
ENSRNOG00000001004	ENSMUSG00000029478	NCOR2
ENSRNOG00000001005	ENSMUSG00000005540	FCER2
ENSRNOG00000001006	ENSMUSG00000059991	NPTX2
ENSRNOG00000001007	ENSMUSG00000038859	BAIAP2L1
ENSRNOG00000001009	ENSMUSG00000047843	BRI3
ENSRNOG00000001010	ENSMUSG00000066621	TECPR1
ENSRNOG00000001011	ENSMUSG00000037962	RFLNA
ENSRNOG00000001017	ENSMUSG00000031495	CD209
ENSRNOG00000001030	ENSMUSG00000022010	TSC22D1
ENSRNOG00000001031	ENSMUSG00000029618	OCM
ENSRNOG00000001032	ENSMUSG00000029617	CCZ1
ENSRNOG00000001033	ENSMUSG00000022009	NUFIP1
ENSRNOG00000001034	ENSMUSG00000011832	EVI5L
ENSRNOG00000001035	ENSMUSG00000029387	GTF2H3
ENSRNOG00000001036	ENSMUSG00000075569	RSPH10B
ENSRNOG00000001039	ENSMUSG00000029388	EIF2B1
ENSRNOG00000001040	ENSMUSG00000079109	PMS2
ENSRNOG00000001043	ENSMUSG00000029389	DDX55
ENSRNOG00000001044	ENSMUSG00000029610	AIMP2
ENSRNOG00000001047	ENSMUSG00000002948	MAP2K7
ENSRNOG00000001048	ENSMUSG00000029607	ANKRD61
ENSRNOG00000001050	ENSMUSG00000029613	EIF2AK1
ENSRNOG00000001052	ENSMUSG00000022003	SLC25A30
ENSRNOG00000001053	ENSMUSG00000029390	TMED2
ENSRNOG00000001055	ENSMUSG00000029392	RILPL1
ENSRNOG00000001056	ENSMUSG00000011837	SNAPC2
ENSRNOG00000001057	ENSMUSG00000048644	CTXN1
ENSRNOG00000001058	ENSMUSG00000002949	TIMM44
ENSRNOG00000001059	ENSMUSG00000051306	USP42
ENSRNOG00000001060	ENSMUSG00000029402	SNRNP35
ENSRNOG00000001061	ENSMUSG00000029401	RILPL2
ENSRNOG00000001062	ENSMUSG00000049327	KMT5A
ENSRNOG00000001064	ENSMUSG00000038095	SBNO1
ENSRNOG00000001065	ENSMUSG00000018001	CYTH3
ENSRNOG00000001066	ENSMUSG00000037254	ITIH2
ENSRNOG00000001068	ENSMUSG00000001847	RAC1
ENSRNOG00000001069	ENSMUSG00000040028	ELAVL1
ENSRNOG00000001070	ENSMUSG00000029394	CDK2AP1
ENSRNOG00000001071	ENSMUSG00000025868	HIGD2B
ENSRNOG00000001072	ENSMUSG00000008206	CERS4
ENSRNOG00000001073	ENSMUSG00000047635	C12orf65
ENSRNOG00000001074	ENSMUSG00000038126	MPHOSPH9
ENSRNOG00000001079	ENSMUSG00000039206	DAGLB
ENSRNOG00000001080	ENSMUSG00000029404	ARL6IP4
ENSRNOG00000001081	ENSMUSG00000023707	OGFOD2
ENSRNOG00000001082	ENSMUSG00000029408	ABCB9
ENSRNOG00000001083	ENSMUSG00000079111	KDELR2
ENSRNOG00000001086	ENSMUSG00000066278	VPS37B
ENSRNOG00000001088	ENSMUSG00000033970	RFC3
ENSRNOG00000001090	ENSMUSG00000016128	STARD13
ENSRNOG00000001091	ENSMUSG00000000915	HIP1R
ENSRNOG00000001092	ENSMUSG00000058488	KL
ENSRNOG00000001094	ENSMUSG00000046658	ZNF316
ENSRNOG00000001098	ENSMUSG00000034021	PDS5B
ENSRNOG00000001099	ENSMUSG00000061898	RBAK
ENSRNOG00000001101	ENSMUSG00000045078	RNF216
ENSRNOG00000001104	ENSMUSG00000056493	FOXK1
ENSRNOG00000001106	ENSMUSG00000023106	DENR
ENSRNOG00000001107	ENSMUSG00000039623	AP5Z1
ENSRNOG00000001108	ENSMUSG00000029655	N4BP2L2
ENSRNOG00000001111	ENSMUSG00000041147	BRCA2
ENSRNOG00000001113	ENSMUSG00000039533	MMD2
ENSRNOG00000001114	ENSMUSG00000029578	WIPI2
ENSRNOG00000001115	ENSMUSG00000050822	SLC29A4
ENSRNOG00000001117	ENSMUSG00000066640	FBXL18
ENSRNOG00000001120	ENSMUSG00000018076	MED13L
ENSRNOG00000001123	ENSMUSG00000032840	C12orf49
ENSRNOG00000001124	ENSMUSG00000032850	RNFT2
ENSRNOG00000001126	ENSMUSG00000032867	FBXW8
ENSRNOG00000001128	ENSMUSG00000029359	TESC
ENSRNOG00000001129	ENSMUSG00000032898	FBXO21
ENSRNOG00000001130	ENSMUSG00000029361	NOS1
ENSRNOG00000001134	ENSMUSG00000029363	RFC5
ENSRNOG00000001135	ENSMUSG00000029364	WSB2
ENSRNOG00000001138	ENSMUSG00000061288	TAOK3
ENSRNOG00000001139	ENSMUSG00000066900	SUDS3
ENSRNOG00000001141	ENSMUSG00000063919	SRRM4
ENSRNOG00000001142	ENSMUSG00000029513	PRKAB1
ENSRNOG00000001143	ENSMUSG00000029516	CIT
ENSRNOG00000001149	ENSMUSG00000029528	PXN
ENSRNOG00000001151	ENSMUSG00000029524	SIRT4
ENSRNOG00000001152	ENSMUSG00000024027	GLP1R
ENSRNOG00000001153	ENSMUSG00000029522	PLA2G1B
ENSRNOG00000001156	ENSMUSG00000054256	MSI1
ENSRNOG00000001157	ENSMUSG00000054134	UMODL1
ENSRNOG00000001158	ENSMUSG00000024030	ABCG1
ENSRNOG00000001159	ENSMUSG00000024029	TFF3
ENSRNOG00000001160	ENSMUSG00000029535	TRIAP1
ENSRNOG00000001161	ENSMUSG00000029536	GATC
ENSRNOG00000001162	ENSMUSG00000024028	TFF2
ENSRNOG00000001163	ENSMUSG00000029538	SRSF9
ENSRNOG00000001164	ENSMUSG00000024032	TFF1
ENSRNOG00000001165	ENSMUSG00000024034	TMPRSS3
ENSRNOG00000001167	ENSMUSG00000042345	UBASH3A
ENSRNOG00000001169	ENSMUSG00000024036	SLC37A1
ENSRNOG00000001170	ENSMUSG00000041697	COX6A1
ENSRNOG00000001171	ENSMUSG00000041733	COQ5
ENSRNOG00000001172	ENSMUSG00000041740	RNF10
ENSRNOG00000001173	ENSMUSG00000029544	CABP1
ENSRNOG00000001174	ENSMUSG00000041119	PDE9A
ENSRNOG00000001177	ENSMUSG00000029545	ACADS
ENSRNOG00000001178	ENSMUSG00000029550	SPPL3
ENSRNOG00000001181	ENSMUSG00000024037	WDR4
ENSRNOG00000001182	ENSMUSG00000024038	NDUFV3
ENSRNOG00000001183	ENSMUSG00000029556	HNF1A
ENSRNOG00000001184	ENSMUSG00000006705	PKNOX1
ENSRNOG00000001185	ENSMUSG00000029559	C12orf43
ENSRNOG00000001187	ENSMUSG00000041827	OASL
ENSRNOG00000001189	ENSMUSG00000024042	SIK1
ENSRNOG00000001190	ENSMUSG00000041890	GIT2
ENSRNOG00000001192	ENSMUSG00000011884	GLTP
ENSRNOG00000001193	ENSMUSG00000002076	HSF2BP
ENSRNOG00000001194	ENSMUSG00000058392	RRP1B
ENSRNOG00000001195	ENSMUSG00000014158	TRPV4
ENSRNOG00000001198	ENSMUSG00000041930	FAM222A
ENSRNOG00000001199	ENSMUSG00000060152	POP5
ENSRNOG00000001201	ENSMUSG00000005054	CSTB
ENSRNOG00000001203	ENSMUSG00000061032	RRP1
ENSRNOG00000001204	ENSMUSG00000041870	ANKRD13A
ENSRNOG00000001205	ENSMUSG00000001211	AGPAT3
ENSRNOG00000001210	ENSMUSG00000032834	PWP2
ENSRNOG00000001212	ENSMUSG00000000730	DNMT3L
ENSRNOG00000001213	ENSMUSG00000000731	AIRE
ENSRNOG00000001214	ENSMUSG00000020277	PFKL
ENSRNOG00000001216	ENSMUSG00000009292	TRPM2
ENSRNOG00000001217	ENSMUSG00000051652	LRRC3
ENSRNOG00000001218	ENSMUSG00000069582	KRTAP4-5
ENSRNOG00000001219	ENSMUSG00000069581	TSPEAR
ENSRNOG00000001220	ENSMUSG00000069583	KRTAP4-5
ENSRNOG00000001222	ENSMUSG00000009293	UBE2G2
ENSRNOG00000001223	ENSMUSG00000009291	PTTG1IP
ENSRNOG00000001224	ENSMUSG00000000290	ITGB2
ENSRNOG00000001225	ENSMUSG00000032977	FAM207A
ENSRNOG00000001227	ENSMUSG00000020262	ADARB1
ENSRNOG00000001228	ENSMUSG00000020260	POFUT2
ENSRNOG00000001229	ENSMUSG00000001435	COL18A1
ENSRNOG00000001232	ENSMUSG00000001436	SLC19A1
ENSRNOG00000001235	ENSMUSG00000000149	GNA12
ENSRNOG00000001236	ENSMUSG00000000148	BRAT1
ENSRNOG00000001237	ENSMUSG00000020196	CABIN1
ENSRNOG00000001238	ENSMUSG00000029422	RSRC2
ENSRNOG00000001239	ENSMUSG00000001666	DDT
ENSRNOG00000001243	ENSMUSG00000029427	ZCCHC8
ENSRNOG00000001247	ENSMUSG00000049550	CLIP1
ENSRNOG00000001249	ENSMUSG00000001119	COL6A1
ENSRNOG00000001250	ENSMUSG00000029570	LFNG
ENSRNOG00000001251	ENSMUSG00000036586	GRIFIN
ENSRNOG00000001252	ENSMUSG00000036599	CHST12
ENSRNOG00000001253	ENSMUSG00000056076	EIF3B
ENSRNOG00000001254	ENSMUSG00000020241	COL6A2
ENSRNOG00000001255	ENSMUSG00000038342	MLXIP
ENSRNOG00000001256	ENSMUSG00000042605	ATXN2
ENSRNOG00000001258	ENSMUSG00000029560	SNX8
ENSRNOG00000001259	ENSMUSG00000042589	CUX2
ENSRNOG00000001260	ENSMUSG00000036639	NUDT1
ENSRNOG00000001261	ENSMUSG00000001155	FTCD
ENSRNOG00000001262	ENSMUSG00000009115	SPATC1L
ENSRNOG00000001265	ENSMUSG00000029554	MAD1L1
ENSRNOG00000001269	ENSMUSG00000004455	PPP1CC
ENSRNOG00000001270	ENSMUSG00000064267	HVCN1
ENSRNOG00000001271	ENSMUSG00000041849	CARD6
ENSRNOG00000001272	ENSMUSG00000001150	MCM3AP
ENSRNOG00000001273	ENSMUSG00000029551	PSMG3
ENSRNOG00000001274	ENSMUSG00000029462	VPS29
ENSRNOG00000001275	ENSMUSG00000036687	TMEM184A
ENSRNOG00000001276	ENSMUSG00000001151	PCNT
ENSRNOG00000001277	ENSMUSG00000018143	MAFK
ENSRNOG00000001278	ENSMUSG00000029464	GPN3
ENSRNOG00000001283	ENSMUSG00000029466	ANAPC7
ENSRNOG00000001284	ENSMUSG00000029546	UNCX
ENSRNOG00000001285	ENSMUSG00000029467	ATP2A2
ENSRNOG00000001287	ENSMUSG00000053647	GPER1
ENSRNOG00000001288	ENSMUSG00000044197	GPR146
ENSRNOG00000001289	ENSMUSG00000053553	C7orf50
ENSRNOG00000001293	ENSMUSG00000025858	GET4
ENSRNOG00000001294	ENSMUSG00000029469	IFT81
ENSRNOG00000001295	ENSMUSG00000033208	S100B
ENSRNOG00000001296	ENSMUSG00000029468	P2RX7
ENSRNOG00000001297	ENSMUSG00000020230	PRMT2
ENSRNOG00000001298	ENSMUSG00000020226	SLC5A4
ENSRNOG00000001299	ENSMUSG00000036817	SUN1
ENSRNOG00000001300	ENSMUSG00000029470	P2RX4
ENSRNOG00000001302	ENSMUSG00000020178	ADORA2A
ENSRNOG00000001303	ENSMUSG00000033444	SPECC1L-ADORA2A
ENSRNOG00000001304	ENSMUSG00000009681	BCR
ENSRNOG00000001309	ENSMUSG00000029471	CAMKK2
ENSRNOG00000001311	ENSMUSG00000020175	RAB36
ENSRNOG00000001312	ENSMUSG00000025856	PDGFA
ENSRNOG00000001313	ENSMUSG00000040009	GNAZ
ENSRNOG00000001314	ENSMUSG00000025854	FAM20C
ENSRNOG00000001315	ENSMUSG00000009070	RSPH14
ENSRNOG00000001316	ENSMUSG00000029472	ANAPC5
ENSRNOG00000001324	ENSMUSG00000093806	ASMT
ENSRNOG00000001329	ENSMUSG00000056966	GJC3
ENSRNOG00000001331	ENSMUSG00000029474	RNF34
ENSRNOG00000001333	ENSMUSG00000037053	AZGP1
ENSRNOG00000001335	ENSMUSG00000029729	ZKSCAN1
ENSRNOG00000001336	ENSMUSG00000049686	ORAI1
ENSRNOG00000001337	ENSMUSG00000038384	SETD1B
ENSRNOG00000001338	ENSMUSG00000029445	HPD
ENSRNOG00000001339	ENSMUSG00000029440	PSMD9
ENSRNOG00000001342	ENSMUSG00000029442	WDR66
ENSRNOG00000001344	ENSMUSG00000029455	ALDH2
ENSRNOG00000001346	ENSMUSG00000019494	COPS6
ENSRNOG00000001348	ENSMUSG00000029616	ERP29
ENSRNOG00000001349	ENSMUSG00000029730	MCM7
ENSRNOG00000001350	ENSMUSG00000042719	NAA25
ENSRNOG00000001351	ENSMUSG00000042726	TRAFD1
ENSRNOG00000001352	ENSMUSG00000042744	HECTD4
ENSRNOG00000001353	ENSMUSG00000019518	AP4M1
ENSRNOG00000001355	ENSMUSG00000036980	TAF6
ENSRNOG00000001357	ENSMUSG00000049285	MBLAC1
ENSRNOG00000001360	ENSMUSG00000036928	STAG3
ENSRNOG00000001367	ENSMUSG00000029510	GPC2
ENSRNOG00000001368	ENSMUSG00000029608	RPH3A
ENSRNOG00000001369	ENSMUSG00000052776	OAS1
ENSRNOG00000001374	ENSMUSG00000029602	RASAL1
ENSRNOG00000001375	ENSMUSG00000075593	GAL3ST4
ENSRNOG00000001376	ENSMUSG00000054619	METTL7A
ENSRNOG00000001377	ENSMUSG00000029599	DDX54
ENSRNOG00000001378	ENSMUSG00000029601	IQCD
ENSRNOG00000001383	ENSMUSG00000032754	SLC8B1
ENSRNOG00000001385	ENSMUSG00000029598	PLBD2
ENSRNOG00000001387	ENSMUSG00000029726	MEPCE
ENSRNOG00000001388	ENSMUSG00000029597	SDS
ENSRNOG00000001391	ENSMUSG00000029596	SDSL
ENSRNOG00000001392	ENSMUSG00000029595	LHX5
ENSRNOG00000001396	ENSMUSG00000037221	MOSPD3
ENSRNOG00000001397	ENSMUSG00000029594	RBM19
ENSRNOG00000001399	ENSMUSG00000018263	TBX5
ENSRNOG00000001402	ENSMUSG00000029720	LRCH4
ENSRNOG00000001404	ENSMUSG00000029722	AGFG2
ENSRNOG00000001407	ENSMUSG00000029716	TFR2
ENSRNOG00000001408	ENSMUSG00000029712	ACTL6B
ENSRNOG00000001409	ENSMUSG00000029713	GNB2
ENSRNOG00000001410	ENSMUSG00000029714	GIGYF1
ENSRNOG00000001412	ENSMUSG00000029711	EPO
ENSRNOG00000001414	ENSMUSG00000037411	SERPINE1
ENSRNOG00000001415	ENSMUSG00000004849	AP1S1
ENSRNOG00000001416	ENSMUSG00000037428	VGF
ENSRNOG00000001417	ENSMUSG00000004846	PLOD3
ENSRNOG00000001418	ENSMUSG00000059518	ZNHIT1
ENSRNOG00000001419	ENSMUSG00000001739	CLDN15
ENSRNOG00000001420	ENSMUSG00000019054	FIS1
ENSRNOG00000001422	ENSMUSG00000004415	COL26A1
ENSRNOG00000001424	ENSMUSG00000029705	CUX1
ENSRNOG00000001425	ENSMUSG00000005057	SH2B2
ENSRNOG00000001426	ENSMUSG00000039737	PRKRIP1
ENSRNOG00000001427	ENSMUSG00000039747	ORAI2
ENSRNOG00000001428	ENSMUSG00000039754	ALKBH4
ENSRNOG00000001429	ENSMUSG00000029703	LRWD1
ENSRNOG00000001430	ENSMUSG00000039771	POLR2J3
ENSRNOG00000001431	ENSMUSG00000004952	RASA4B
ENSRNOG00000001432	ENSMUSG00000004947	DTX2
ENSRNOG00000001434	ENSMUSG00000004948	ZP3
ENSRNOG00000001435	ENSMUSG00000029699	SSC4D
ENSRNOG00000001436	ENSMUSG00000051391	YWHAG
ENSRNOG00000001439	ENSMUSG00000039860	SRRM3
ENSRNOG00000001440	ENSMUSG00000019179	MDH2
ENSRNOG00000001441	ENSMUSG00000039886	TMEM120A
ENSRNOG00000001442	ENSMUSG00000005514	POR
ENSRNOG00000001443	ENSMUSG00000039917	RHBDD2
ENSRNOG00000001448	ENSMUSG00000039959	HIP1
ENSRNOG00000001449	ENSMUSG00000053293	POM121C
ENSRNOG00000001450	ENSMUSG00000000916	NSUN5
ENSRNOG00000001451	ENSMUSG00000040013	FKBP6
ENSRNOG00000001452	ENSMUSG00000049551	FZD9
ENSRNOG00000001453	ENSMUSG00000002748	BAZ1B
ENSRNOG00000001454	ENSMUSG00000040731	EIF4H
ENSRNOG00000001455	ENSMUSG00000021375	KIF13A
ENSRNOG00000001456	ENSMUSG00000021374	NUP153
ENSRNOG00000001457	ENSMUSG00000023104	RFC2
ENSRNOG00000001465	ENSMUSG00000035847	IDS
ENSRNOG00000001469	ENSMUSG00000029675	ELN
ENSRNOG00000001470	ENSMUSG00000029674	LIMK1
ENSRNOG00000001476	ENSMUSG00000047501	CLDN4
ENSRNOG00000001478	ENSMUSG00000023079	GTF2IRD1
ENSRNOG00000001479	ENSMUSG00000060261	GTF2I
ENSRNOG00000001480	ENSMUSG00000015950	NCF1
ENSRNOG00000001483	ENSMUSG00000061979	RCC1L
ENSRNOG00000001488	ENSMUSG00000014769	PSMB1
ENSRNOG00000001489	ENSMUSG00000014767	TBP
ENSRNOG00000001490	ENSMUSG00000014771	PDCD2
ENSRNOG00000001492	ENSMUSG00000030376	SLC8A2
ENSRNOG00000001493	ENSMUSG00000006021	KPTN
ENSRNOG00000001494	ENSMUSG00000006024	NAPA
ENSRNOG00000001499	ENSMUSG00000089661	MIA-RAB4B
ENSRNOG00000001500	ENSMUSG00000053291	RAB4B
ENSRNOG00000001501	ENSMUSG00000061479	SNRPA
ENSRNOG00000001506	ENSMUSG00000033578	TMEM35A
ENSRNOG00000001514	ENSMUSG00000055612	CDCA7
ENSRNOG00000001516	ENSMUSG00000049044	RAPGEF4
ENSRNOG00000001517	ENSMUSG00000006494	PDK1
ENSRNOG00000001518	ENSMUSG00000027111	ITGA6
ENSRNOG00000001519	ENSMUSG00000023391	DLX2
ENSRNOG00000001520	ENSMUSG00000041911	DLX1
ENSRNOG00000001524	ENSMUSG00000027018	HAT1
ENSRNOG00000001525	ENSMUSG00000022790	IGSF11
ENSRNOG00000001527	ENSMUSG00000075122	CD80
ENSRNOG00000001528	ENSMUSG00000047261	GAP43
ENSRNOG00000001531	ENSMUSG00000020309	CHAC2
ENSRNOG00000001544	ENSMUSG00000041134	CYYR1
ENSRNOG00000001547	ENSMUSG00000042410	AGPS
ENSRNOG00000001548	ENSMUSG00000015839	NFE2L2
ENSRNOG00000001554	ENSMUSG00000022864	C21orf91
ENSRNOG00000001555	ENSMUSG00000022863	BTG3
ENSRNOG00000001557	ENSMUSG00000022865	CXADR
ENSRNOG00000001559	ENSMUSG00000027099	MTX2
ENSRNOG00000001571	ENSMUSG00000050520	CLDN8
ENSRNOG00000001572	ENSMUSG00000042448	HOXD1
ENSRNOG00000001573	ENSMUSG00000022867	USP25
ENSRNOG00000001575	ENSMUSG00000022935	GRIK1
ENSRNOG00000001577	ENSMUSG00000079277	HOXD3
ENSRNOG00000001580	ENSMUSG00000043342	HOXD9
ENSRNOG00000001581	ENSMUSG00000050368	HOXD10
ENSRNOG00000001582	ENSMUSG00000025612	BACH1
ENSRNOG00000001585	ENSMUSG00000048490	NRIP1
ENSRNOG00000001587	ENSMUSG00000001823	HOXD12
ENSRNOG00000001588	ENSMUSG00000001819	HOXD13
ENSRNOG00000001589	ENSMUSG00000001815	EVX2
ENSRNOG00000001592	ENSMUSG00000025613	CCT8
ENSRNOG00000001593	ENSMUSG00000009207	LNPK
ENSRNOG00000001597	ENSMUSG00000027104	ATF2
ENSRNOG00000001598	ENSMUSG00000025616	USP16
ENSRNOG00000001599	ENSMUSG00000041079	RWDD2B
ENSRNOG00000001602	ENSMUSG00000052299	LTN1
ENSRNOG00000001603	ENSMUSG00000044442	N6AMT1
ENSRNOG00000001607	ENSMUSG00000022893	ADAMTS1
ENSRNOG00000001608	ENSMUSG00000075033	NXPE3
ENSRNOG00000001609	ENSMUSG00000022604	CEP97
ENSRNOG00000001613	ENSMUSG00000022601	ZBTB11
ENSRNOG00000001616	ENSMUSG00000052917	SENP7
ENSRNOG00000001618	ENSMUSG00000005251	RIPK4
ENSRNOG00000001620	ENSMUSG00000014039	PRDM15
ENSRNOG00000001621	ENSMUSG00000045975	C2CD2
ENSRNOG00000001622	ENSMUSG00000035270	IMPG2
ENSRNOG00000001623	ENSMUSG00000046962	ZBTB21
ENSRNOG00000001627	ENSMUSG00000035258	ABI3BP
ENSRNOG00000001628	ENSMUSG00000090223	PCP4
ENSRNOG00000001632	ENSMUSG00000022914	BRWD1
ENSRNOG00000001633	ENSMUSG00000022757	TFG
ENSRNOG00000001634	ENSMUSG00000022755	ADGRG7
ENSRNOG00000001640	ENSMUSG00000022752	TOMM70
ENSRNOG00000001642	ENSMUSG00000022749	TBC1D23
ENSRNOG00000001643	ENSMUSG00000022913	PSMG1
ENSRNOG00000001645	ENSMUSG00000043336	FILIP1L
ENSRNOG00000001647	ENSMUSG00000022895	ETS2
ENSRNOG00000001652	ENSMUSG00000040732	ERG
ENSRNOG00000001653	ENSMUSG00000022747	ST3GAL6
ENSRNOG00000001654	ENSMUSG00000022742	CPOX
ENSRNOG00000001656	ENSMUSG00000062609	KCNJ15
ENSRNOG00000001657	ENSMUSG00000022744	CLDND1
ENSRNOG00000001658	ENSMUSG00000043301	KCNJ6
ENSRNOG00000001662	ENSMUSG00000022897	DYRK1A
ENSRNOG00000001679	ENSMUSG00000074991	GABRR3
ENSRNOG00000001680	ENSMUSG00000022724	RIOX2
ENSRNOG00000001682	ENSMUSG00000040785	TTC3
ENSRNOG00000001684	ENSMUSG00000022941	RIPPLY3
ENSRNOG00000001686	ENSMUSG00000040820	HLCS
ENSRNOG00000001687	ENSMUSG00000022723	CRYBG3
ENSRNOG00000001689	ENSMUSG00000022722	ARL6
ENSRNOG00000001691	ENSMUSG00000047109	CLDN14
ENSRNOG00000001692	ENSMUSG00000022945	CHAF1B
ENSRNOG00000001699	ENSMUSG00000022948	SETD4
ENSRNOG00000001700	ENSMUSG00000039137	WHRN
ENSRNOG00000001701	ENSMUSG00000022947	CBR3
ENSRNOG00000001704	ENSMUSG00000022952	RUNX1
ENSRNOG00000001706	ENSMUSG00000061751	KALRN
ENSRNOG00000001707	ENSMUSG00000046613	VWA5B2
ENSRNOG00000001708	ENSMUSG00000003233	DVL3
ENSRNOG00000001709	ENSMUSG00000022841	AP2M1
ENSRNOG00000001710	ENSMUSG00000003234	ABCF3
ENSRNOG00000001712	ENSMUSG00000033809	ALG3
ENSRNOG00000001713	ENSMUSG00000017057	IL13RA1
ENSRNOG00000001714	ENSMUSG00000038094	ATP13A4
ENSRNOG00000001715	ENSMUSG00000022842	ECE2
ENSRNOG00000001717	ENSMUSG00000038084	OPA1
ENSRNOG00000001719	ENSMUSG00000006998	PSMD2
ENSRNOG00000001720	ENSMUSG00000022528	HES1
ENSRNOG00000001724	ENSMUSG00000022533	ATP13A3
ENSRNOG00000001726	ENSMUSG00000022537	TMEM44
ENSRNOG00000001727	ENSMUSG00000022538	LSG1
ENSRNOG00000001728	ENSMUSG00000046546	FAM43A
ENSRNOG00000001729	ENSMUSG00000047434	XXYLT1
ENSRNOG00000001730	ENSMUSG00000049076	ACAP2
ENSRNOG00000001733	ENSMUSG00000047714	PPP1R2
ENSRNOG00000001736	ENSMUSG00000046598	BDH1
ENSRNOG00000001738	ENSMUSG00000045983	EIF4G1
ENSRNOG00000001739	ENSMUSG00000022780	MELTF
ENSRNOG00000001742	ENSMUSG00000022843	CLCN2
ENSRNOG00000001746	ENSMUSG00000022774	NCBP2
ENSRNOG00000001747	ENSMUSG00000022781	PAK2
ENSRNOG00000001748	ENSMUSG00000021018	POLR2H
ENSRNOG00000001750	ENSMUSG00000006958	CHRD
ENSRNOG00000001752	ENSMUSG00000052384	NRROS
ENSRNOG00000001754	ENSMUSG00000022787	WDR53
ENSRNOG00000001756	ENSMUSG00000053774	UBXN7
ENSRNOG00000001757	ENSMUSG00000079625	TM4SF19
ENSRNOG00000001758	ENSMUSG00000014075	TCTEX1D2
ENSRNOG00000001762	ENSMUSG00000005615	PCYT1A
ENSRNOG00000001764	ENSMUSG00000033653	VPS8
ENSRNOG00000001765	ENSMUSG00000035699	SLC51A
ENSRNOG00000001766	ENSMUSG00000022797	TFRC
ENSRNOG00000001767	ENSMUSG00000043391	C3orf70
ENSRNOG00000001769	ENSMUSG00000022791	TNK2
ENSRNOG00000001770	ENSMUSG00000022853	EHHADH
ENSRNOG00000001773	ENSMUSG00000022855	SENP2
ENSRNOG00000001774	ENSMUSG00000022801	LRCH3
ENSRNOG00000001776	ENSMUSG00000035638	MUC20
ENSRNOG00000001777	ENSMUSG00000079620	MUC4
ENSRNOG00000001781	ENSMUSG00000022802	LMLN
ENSRNOG00000001782	ENSMUSG00000022807	OSBPL11
ENSRNOG00000001783	ENSMUSG00000022858	TRA2B
ENSRNOG00000001785	ENSMUSG00000013089	ETV5
ENSRNOG00000001786	ENSMUSG00000022808	SNX4
ENSRNOG00000001789	ENSMUSG00000022811	ZNF148
ENSRNOG00000001792	ENSMUSG00000035506	SLC12A8
ENSRNOG00000001793	ENSMUSG00000075254	HEG1
ENSRNOG00000001794	ENSMUSG00000022824	MUC13
ENSRNOG00000001796	ENSMUSG00000022861	DGKG
ENSRNOG00000001797	ENSMUSG00000022814	UMPS
ENSRNOG00000001803	ENSMUSG00000004460	DNAJB11
ENSRNOG00000001804	ENSMUSG00000030287	ITPR2
ENSRNOG00000001806	ENSMUSG00000022871	FETUB
ENSRNOG00000001807	ENSMUSG00000030255	SSPN
ENSRNOG00000001808	ENSMUSG00000040250	INTS13
ENSRNOG00000001809	ENSMUSG00000022877	HRG
ENSRNOG00000001811	ENSMUSG00000040242	FGFR1OP2
ENSRNOG00000001813	ENSMUSG00000022789	DNM1L
ENSRNOG00000001815	ENSMUSG00000022884	EIF4A2
ENSRNOG00000001816	ENSMUSG00000022881	RFC4
ENSRNOG00000001817	ENSMUSG00000040234	TM7SF3
ENSRNOG00000001820	ENSMUSG00000030291	MED21
ENSRNOG00000001821	ENSMUSG00000022878	ADIPOQ
ENSRNOG00000001823	ENSMUSG00000022885	ST6GAL1
ENSRNOG00000001825	ENSMUSG00000041957	PKP2
ENSRNOG00000001827	ENSMUSG00000022887	MASP1
ENSRNOG00000001828	ENSMUSG00000001630	STK38L
ENSRNOG00000001830	ENSMUSG00000040187	ARNTL2
ENSRNOG00000001833	ENSMUSG00000022673	MCM4
ENSRNOG00000001834	ENSMUSG00000022671	MZT2A
ENSRNOG00000001837	ENSMUSG00000004366	SST
ENSRNOG00000001839	ENSMUSG00000059280	VPREB1
ENSRNOG00000001840	ENSMUSG00000040121	REP15
ENSRNOG00000001842	ENSMUSG00000040112	MRPS35
ENSRNOG00000001843	ENSMUSG00000022508	BCL6
ENSRNOG00000001844	ENSMUSG00000040102	KLHL42
ENSRNOG00000001845	ENSMUSG00000022779	TOP3B
ENSRNOG00000001847	ENSMUSG00000030301	CCDC91
ENSRNOG00000001849	ENSMUSG00000063358	MAPK1
ENSRNOG00000001851	ENSMUSG00000030303	FAR2
ENSRNOG00000001852	ENSMUSG00000030304	ERGIC2
ENSRNOG00000001854	ENSMUSG00000030306	TMTC1
ENSRNOG00000001858	ENSMUSG00000022773	YPEL1
ENSRNOG00000001859	ENSMUSG00000022769	SDF2L1
ENSRNOG00000001860	ENSMUSG00000022768	CCDC116
ENSRNOG00000001861	ENSMUSG00000041774	YDJC
ENSRNOG00000001864	ENSMUSG00000055692	TMEM191B
ENSRNOG00000001865	ENSMUSG00000022766	SERPIND1
ENSRNOG00000001867	ENSMUSG00000022765	SNAP29
ENSRNOG00000001868	ENSMUSG00000006134	CRKL
ENSRNOG00000001869	ENSMUSG00000064147	RAB44
ENSRNOG00000001870	ENSMUSG00000022761	LZTR1
ENSRNOG00000001872	ENSMUSG00000022759	LRRC74B
ENSRNOG00000001873	ENSMUSG00000022758	P2RX6
ENSRNOG00000001874	ENSMUSG00000022756	SLC7A4
ENSRNOG00000001875	ENSMUSG00000005899	SMPD4
ENSRNOG00000001876	ENSMUSG00000041617	CCDC74A
ENSRNOG00000001877	ENSMUSG00000012114	MED15
ENSRNOG00000001878	ENSMUSG00000022750	KLHL22
ENSRNOG00000001880	ENSMUSG00000003531	DGCR6L
ENSRNOG00000001884	ENSMUSG00000005732	RANBP1
ENSRNOG00000001885	ENSMUSG00000022721	TRMT2A
ENSRNOG00000001886	ENSMUSG00000022718	DGCR8
ENSRNOG00000001888	ENSMUSG00000000325	ARVCF
ENSRNOG00000001889	ENSMUSG00000000326	COMT
ENSRNOG00000001890	ENSMUSG00000075704	TXNRD2
ENSRNOG00000001891	ENSMUSG00000000884	GNB1L
ENSRNOG00000001892	ENSMUSG00000009097	TBX1
ENSRNOG00000001893	ENSMUSG00000020349	PPP2CA
ENSRNOG00000001908	ENSMUSG00000043008	KLHL6
ENSRNOG00000001911	ENSMUSG00000041205	MAP6D1
ENSRNOG00000001912	ENSMUSG00000049537	TECRL
ENSRNOG00000001915	ENSMUSG00000022860	CHODL
ENSRNOG00000001916	ENSMUSG00000022857	TMPRSS15
ENSRNOG00000001923	ENSMUSG00000048399	TPRG1
ENSRNOG00000001924	ENSMUSG00000022510	TP63
ENSRNOG00000001926	ENSMUSG00000022512	CLDN1
ENSRNOG00000001928	ENSMUSG00000022514	IL1RAP
ENSRNOG00000001930	ENSMUSG00000038127	CCDC50
ENSRNOG00000001931	ENSMUSG00000022523	FGF12
ENSRNOG00000001943	ENSMUSG00000022651	RETNLB
ENSRNOG00000001950	ENSMUSG00000007907	CABS1
ENSRNOG00000001951	ENSMUSG00000001622	CSN3
ENSRNOG00000001953	ENSMUSG00000040605	BACE2
ENSRNOG00000001955	ENSMUSG00000061100	RETNLB
ENSRNOG00000001956	ENSMUSG00000064061	DZIP3
ENSRNOG00000001957	ENSMUSG00000029272	SULT1E1
ENSRNOG00000001958	ENSMUSG00000032965	IFT57
ENSRNOG00000001959	ENSMUSG00000000386	MX1
ENSRNOG00000001962	ENSMUSG00000022938	FAM3B
ENSRNOG00000001963	ENSMUSG00000023341	MX1
ENSRNOG00000001964	ENSMUSG00000055447	CD47
ENSRNOG00000001967	ENSMUSG00000029269	SULT1B1
ENSRNOG00000001971	ENSMUSG00000022641	BBX
ENSRNOG00000001973	ENSMUSG00000035780	UGT2A3
ENSRNOG00000001976	ENSMUSG00000000385	TMPRSS2
ENSRNOG00000001979	ENSMUSG00000022951	RCAN1
ENSRNOG00000001982	ENSMUSG00000022637	CBLB
ENSRNOG00000001984	ENSMUSG00000039639	KCNE1
ENSRNOG00000001989	ENSMUSG00000022636	ALCAM
ENSRNOG00000001992	ENSMUSG00000052459	ATP6V1A
ENSRNOG00000001996	ENSMUSG00000035851	YTHDC1
ENSRNOG00000002001	ENSMUSG00000022957	ITSN1
ENSRNOG00000002004	ENSMUSG00000035456	PRDM8
ENSRNOG00000002005	ENSMUSG00000048764	TMPRSS11F
ENSRNOG00000002011	ENSMUSG00000029255	GNRHR
ENSRNOG00000002012	ENSMUSG00000022960	DONSON
ENSRNOG00000002013	ENSMUSG00000022696	SIDT1
ENSRNOG00000002014	ENSMUSG00000029254	STAP1
ENSRNOG00000002021	ENSMUSG00000022961	SON
ENSRNOG00000002024	ENSMUSG00000029245	EPHA5
ENSRNOG00000002026	ENSMUSG00000039763	DNAJC28
ENSRNOG00000002028	ENSMUSG00000022964	TMEM50B
ENSRNOG00000002032	ENSMUSG00000022965	IFNGR2
ENSRNOG00000002035	ENSMUSG00000055725	PAQR3
ENSRNOG00000002036	ENSMUSG00000022974	PAXBP1
ENSRNOG00000002039	ENSMUSG00000011831	EVI5
ENSRNOG00000002040	ENSMUSG00000034663	BMP2K
ENSRNOG00000002041	ENSMUSG00000022687	BOC
ENSRNOG00000002042	ENSMUSG00000029275	GFI1
ENSRNOG00000002044	ENSMUSG00000022668	GTPBP8
ENSRNOG00000002045	ENSMUSG00000029484	ANXA3
ENSRNOG00000002046	ENSMUSG00000022667	CD200R1L
ENSRNOG00000002050	ENSMUSG00000036256	IGFBP7
ENSRNOG00000002051	ENSMUSG00000022973	SYNJ1
ENSRNOG00000002052	ENSMUSG00000022665	CCDC80
ENSRNOG00000002053	ENSMUSG00000034687	FRAS1
ENSRNOG00000002054	ENSMUSG00000029276	GLMN
ENSRNOG00000002055	ENSMUSG00000036285	NOA1
ENSRNOG00000002057	ENSMUSG00000029321	SLC10A6
ENSRNOG00000002061	ENSMUSG00000034573	PTPN13
ENSRNOG00000002069	ENSMUSG00000022664	SLC35A5
ENSRNOG00000002070	ENSMUSG00000029486	MRPL1
ENSRNOG00000002072	ENSMUSG00000039903	EVA1C
ENSRNOG00000002073	ENSMUSG00000029279	BRDT
ENSRNOG00000002074	ENSMUSG00000029249	REST
ENSRNOG00000002075	ENSMUSG00000034724	CNOT6L
ENSRNOG00000002079	ENSMUSG00000046709	MAPK10
ENSRNOG00000002080	ENSMUSG00000039929	URB1
ENSRNOG00000002085	ENSMUSG00000029248	THEGL
ENSRNOG00000002089	ENSMUSG00000029385	CCNG2
ENSRNOG00000002091	ENSMUSG00000041303	GTF3C3
ENSRNOG00000002092	ENSMUSG00000053414	HUNK
ENSRNOG00000002093	ENSMUSG00000029287	TGFBR3
ENSRNOG00000002094	ENSMUSG00000022663	ATG3
ENSRNOG00000002097	ENSMUSG00000049907	RASL11B
ENSRNOG00000002100	ENSMUSG00000036323	SRP72
ENSRNOG00000002101	ENSMUSG00000029247	PAICS
ENSRNOG00000002104	ENSMUSG00000022983	SCAF4
ENSRNOG00000002105	ENSMUSG00000029283	CDC7
ENSRNOG00000002106	ENSMUSG00000054814	USP46
ENSRNOG00000002110	ENSMUSG00000029185	FAM114A1
ENSRNOG00000002112	ENSMUSG00000049606	ZNF644
ENSRNOG00000002115	ENSMUSG00000022982	SOD1
ENSRNOG00000002116	ENSMUSG00000025508	RPLP2
ENSRNOG00000002117	ENSMUSG00000034384	BARHL2
ENSRNOG00000002120	ENSMUSG00000029155	SPATA18
ENSRNOG00000002121	ENSMUSG00000046079	LRRC8D
ENSRNOG00000002122	ENSMUSG00000054720	LRRC8C
ENSRNOG00000002125	ENSMUSG00000063015	CCNI
ENSRNOG00000002126	ENSMUSG00000022762	NCAM2
ENSRNOG00000002128	ENSMUSG00000029246	PPAT
ENSRNOG00000002129	ENSMUSG00000070639	LRRC8B
ENSRNOG00000002134	ENSMUSG00000029298	GBP6
ENSRNOG00000002135	ENSMUSG00000029156	SGCB
ENSRNOG00000002137	ENSMUSG00000055923	AASDH
ENSRNOG00000002141	ENSMUSG00000022661	CD200
ENSRNOG00000002142	ENSMUSG00000029330	CDS1
ENSRNOG00000002144	ENSMUSG00000036435	EXOC1
ENSRNOG00000002145	ENSMUSG00000033177	TMPRSS7
ENSRNOG00000002146	ENSMUSG00000034462	PKD2
ENSRNOG00000002149	ENSMUSG00000035187	NKX6-1
ENSRNOG00000002151	ENSMUSG00000022658	TAGLN3
ENSRNOG00000002152	ENSMUSG00000051674	DCUN1D4
ENSRNOG00000002153	ENSMUSG00000036403	CEP135
ENSRNOG00000002154	ENSMUSG00000053863	MEPE
ENSRNOG00000002158	ENSMUSG00000029306	IBSP
ENSRNOG00000002159	ENSMUSG00000029314	GPAT3
ENSRNOG00000002161	ENSMUSG00000051498	TLR6
ENSRNOG00000002163	ENSMUSG00000029178	KLF3
ENSRNOG00000002164	ENSMUSG00000029236	NMU
ENSRNOG00000002167	ENSMUSG00000029307	DMP1
ENSRNOG00000002168	ENSMUSG00000053268	DSPP
ENSRNOG00000002169	ENSMUSG00000029235	PDCL2
ENSRNOG00000002171	ENSMUSG00000033149	PHLDB2
ENSRNOG00000002174	ENSMUSG00000029154	CWH43
ENSRNOG00000002175	ENSMUSG00000029238	CLOCK
ENSRNOG00000002176	ENSMUSG00000022656	NECTIN3
ENSRNOG00000002177	ENSMUSG00000029209	GNPDA2
ENSRNOG00000002178	ENSMUSG00000016833	MRPS18C
ENSRNOG00000002180	ENSMUSG00000029174	TBC1D1
ENSRNOG00000002181	ENSMUSG00000035266	HELQ
ENSRNOG00000002185	ENSMUSG00000029171	PGM2
ENSRNOG00000002186	ENSMUSG00000029310	NUDT9
ENSRNOG00000002187	ENSMUSG00000022832	ROPN1B
ENSRNOG00000002188	ENSMUSG00000035273	HPSE
ENSRNOG00000002191	ENSMUSG00000060512	C4orf19
ENSRNOG00000002192	ENSMUSG00000047881	RELL1
ENSRNOG00000002194	ENSMUSG00000029319	COQ2
ENSRNOG00000002196	ENSMUSG00000029153	OCIAD2
ENSRNOG00000002199	ENSMUSG00000029234	TMEM165
ENSRNOG00000002202	ENSMUSG00000045314	SOWAHB
ENSRNOG00000002203	ENSMUSG00000035310	LIN54
ENSRNOG00000002204	ENSMUSG00000050050	CCDC158
ENSRNOG00000002205	ENSMUSG00000029152	OCIAD1
ENSRNOG00000002207	ENSMUSG00000029208	GUF1
ENSRNOG00000002208	ENSMUSG00000029381	SHROOM3
ENSRNOG00000002210	ENSMUSG00000029311	HSD17B11
ENSRNOG00000002212	ENSMUSG00000034528	HSD17B13
ENSRNOG00000002214	ENSMUSG00000029312	KLHL8
ENSRNOG00000002215	ENSMUSG00000022836	MYLK
ENSRNOG00000002216	ENSMUSG00000029233	SRD5A3
ENSRNOG00000002217	ENSMUSG00000029322	PLAC8
ENSRNOG00000002218	ENSMUSG00000047963	STBD1
ENSRNOG00000002224	ENSMUSG00000029158	YIPF7
ENSRNOG00000002225	ENSMUSG00000029426	SCARB2
ENSRNOG00000002227	ENSMUSG00000005672	KIT
ENSRNOG00000002229	ENSMUSG00000022840	ADCY5
ENSRNOG00000002232	ENSMUSG00000029313	AFF1
ENSRNOG00000002238	ENSMUSG00000052133	SEMA5B
ENSRNOG00000002241	ENSMUSG00000022849	HSPBAP1
ENSRNOG00000002244	ENSMUSG00000029231	PDGFRA
ENSRNOG00000002246	ENSMUSG00000029221	SLC30A9
ENSRNOG00000002247	ENSMUSG00000034826	NUP54
ENSRNOG00000002248	ENSMUSG00000070733	FRYL
ENSRNOG00000002251	ENSMUSG00000035325	SEC31A
ENSRNOG00000002253	ENSMUSG00000034379	WDR5B
ENSRNOG00000002254	ENSMUSG00000037720	TMEM33
ENSRNOG00000002256	ENSMUSG00000034842	ART3
ENSRNOG00000002258	ENSMUSG00000050640	TMEM150C
ENSRNOG00000002262	ENSMUSG00000029326	ENOPH1
ENSRNOG00000002265	ENSMUSG00000051980	CASR
ENSRNOG00000002266	ENSMUSG00000035946	GSX2
ENSRNOG00000002267	ENSMUSG00000029229	CHIC2
ENSRNOG00000002271	ENSMUSG00000036087	SLAIN2
ENSRNOG00000002272	ENSMUSG00000029228	LNX1
ENSRNOG00000002273	ENSMUSG00000029413	NAAA
ENSRNOG00000002276	ENSMUSG00000025626	PHF6
ENSRNOG00000002278	ENSMUSG00000029217	TEC
ENSRNOG00000002280	ENSMUSG00000031246	SH3BGRL
ENSRNOG00000002285	ENSMUSG00000036022	FAM122B
ENSRNOG00000002289	ENSMUSG00000022900	ILDR1
ENSRNOG00000002291	ENSMUSG00000063663	BRWD3
ENSRNOG00000002292	ENSMUSG00000000568	HNRNPD
ENSRNOG00000002294	ENSMUSG00000071669	SNX29
ENSRNOG00000002301	ENSMUSG00000029407	USO1
ENSRNOG00000002302	ENSMUSG00000005220	CORIN
ENSRNOG00000002303	ENSMUSG00000042529	KCNJ12
ENSRNOG00000002304	ENSMUSG00000010142	TNFRSF13B
ENSRNOG00000002305	ENSMUSG00000022899	SLC15A2
ENSRNOG00000002309	ENSMUSG00000039377	HLX
ENSRNOG00000002312	ENSMUSG00000046808	ATP10D
ENSRNOG00000002318	ENSMUSG00000037736	LIMCH1
ENSRNOG00000002319	ENSMUSG00000026374	TSN
ENSRNOG00000002320	ENSMUSG00000029213	COMMD8
ENSRNOG00000002322	ENSMUSG00000039349	C1orf115
ENSRNOG00000002323	ENSMUSG00000031242	CHMP1B
ENSRNOG00000002327	ENSMUSG00000029212	GABRB1
ENSRNOG00000002331	ENSMUSG00000019102	ALDH3A1
ENSRNOG00000002332	ENSMUSG00000023074	MOSPD1
ENSRNOG00000002336	ENSMUSG00000029211	GABRA4
ENSRNOG00000002338	ENSMUSG00000000276	DGKE
ENSRNOG00000002339	ENSMUSG00000026620	MARK1
ENSRNOG00000002340	ENSMUSG00000057863	RPL36
ENSRNOG00000002341	ENSMUSG00000000275	TRIM25
ENSRNOG00000002342	ENSMUSG00000010025	ALDH3A2
ENSRNOG00000002343	ENSMUSG00000029223	UCHL1
ENSRNOG00000002345	ENSMUSG00000089809	RASGEF1B
ENSRNOG00000002346	ENSMUSG00000031241	TBX22
ENSRNOG00000002347	ENSMUSG00000026482	RGL1
ENSRNOG00000002349	ENSMUSG00000000560	GABRA2
ENSRNOG00000002350	ENSMUSG00000022838	EAF2
ENSRNOG00000002352	ENSMUSG00000014980	TSEN15
ENSRNOG00000002353	ENSMUSG00000039318	RAB3GAP2
ENSRNOG00000002358	ENSMUSG00000000278	SCPEP1
ENSRNOG00000002360	ENSMUSG00000001260	GABRG1
ENSRNOG00000002361	ENSMUSG00000029334	PRKG2
ENSRNOG00000002364	ENSMUSG00000010086	RNF112
ENSRNOG00000002365	ENSMUSG00000031239	ITM2A
ENSRNOG00000002368	ENSMUSG00000026618	IARS2
ENSRNOG00000002369	ENSMUSG00000042671	RGS8
ENSRNOG00000002372	ENSMUSG00000020354	SGCD
ENSRNOG00000002373	ENSMUSG00000018428	AKAP1
ENSRNOG00000002376	ENSMUSG00000064302	CLASP1
ENSRNOG00000002378	ENSMUSG00000026617	BPNT1
ENSRNOG00000002379	ENSMUSG00000061082	PLAC1
ENSRNOG00000002381	ENSMUSG00000029335	BMP3
ENSRNOG00000002382	ENSMUSG00000042436	MFAP4
ENSRNOG00000002385	ENSMUSG00000006014	PRG4
ENSRNOG00000002387	ENSMUSG00000049536	TCEAL1
ENSRNOG00000002388	ENSMUSG00000040365	TRIM41
ENSRNOG00000002389	ENSMUSG00000031422	MORF4L2
ENSRNOG00000002391	ENSMUSG00000018595	GLRA4
ENSRNOG00000002394	ENSMUSG00000006005	TPR
ENSRNOG00000002396	ENSMUSG00000026315	SERPINB8
ENSRNOG00000002397	ENSMUSG00000026614	SLC30A10
ENSRNOG00000002407	ENSMUSG00000022680	PDXDC1
ENSRNOG00000002408	ENSMUSG00000070780	RBM47
ENSRNOG00000002412	ENSMUSG00000001034	MAPK7
ENSRNOG00000002413	ENSMUSG00000031119	GPC4
ENSRNOG00000002414	ENSMUSG00000026380	TFCP2L1
ENSRNOG00000002417	ENSMUSG00000092572	SERPINB10
ENSRNOG00000002418	ENSMUSG00000039239	TGFB2
ENSRNOG00000002419	ENSMUSG00000031425	PLP1
ENSRNOG00000002420	ENSMUSG00000037965	ZC3H7A
ENSRNOG00000002423	ENSMUSG00000020523	FAM114A2
ENSRNOG00000002425	ENSMUSG00000020553	PCTP
ENSRNOG00000002428	ENSMUSG00000049929	LPAR4
ENSRNOG00000002433	ENSMUSG00000029405	G3BP2
ENSRNOG00000002434	ENSMUSG00000069763	TMEM100
ENSRNOG00000002436	ENSMUSG00000003948	MMD
ENSRNOG00000002440	ENSMUSG00000004451	RALB
ENSRNOG00000002443	ENSMUSG00000020522	MFAP3
ENSRNOG00000002449	ENSMUSG00000025268	MAGED2
ENSRNOG00000002450	ENSMUSG00000001305	RRP15
ENSRNOG00000002452	ENSMUSG00000022498	TXNDC11
ENSRNOG00000002454	ENSMUSG00000026484	RNF2
ENSRNOG00000002456	ENSMUSG00000003949	HLF
ENSRNOG00000002459	ENSMUSG00000047746	FBXO40
ENSRNOG00000002460	ENSMUSG00000062345	SERPINB2
ENSRNOG00000002461	ENSMUSG00000005397	NID1
ENSRNOG00000002462	ENSMUSG00000001039	B9D1
ENSRNOG00000002468	ENSMUSG00000015829	TNR
ENSRNOG00000002469	ENSMUSG00000040350	TRIM7
ENSRNOG00000002471	ENSMUSG00000034206	POLQ
ENSRNOG00000002474	ENSMUSG00000020541	TOM1L1
ENSRNOG00000002478	ENSMUSG00000003721	INSIG2
ENSRNOG00000002480	ENSMUSG00000021306	GPR137B
ENSRNOG00000002484	ENSMUSG00000029205	CHRNA9
ENSRNOG00000002487	ENSMUSG00000036109	MBNL3
ENSRNOG00000002488	ENSMUSG00000020520	GALNT10
ENSRNOG00000002496	ENSMUSG00000022829	STXBP5L
ENSRNOG00000002501	ENSMUSG00000039224	DDX3X
ENSRNOG00000002504	ENSMUSG00000026611	SPATA17
ENSRNOG00000002506	ENSMUSG00000029403	CDKL2
ENSRNOG00000002509	ENSMUSG00000025266	GNL3L
ENSRNOG00000002511	ENSMUSG00000020357	FLT4
ENSRNOG00000002512	ENSMUSG00000039210	GPATCH2
ENSRNOG00000002514	ENSMUSG00000026339	CCDC93
ENSRNOG00000002516	ENSMUSG00000031337	MTM1
ENSRNOG00000002517	ENSMUSG00000006007	PDC
ENSRNOG00000002520	ENSMUSG00000022500	LITAF
ENSRNOG00000002524	ENSMUSG00000039904	GPR37
ENSRNOG00000002525	ENSMUSG00000032487	PTGS2
ENSRNOG00000002529	ENSMUSG00000050029	RAP2C
ENSRNOG00000002535	ENSMUSG00000046755	KIF2B
ENSRNOG00000002536	ENSMUSG00000048970	C1GALT1C1
ENSRNOG00000002537	ENSMUSG00000041245	WNK3
ENSRNOG00000002538	ENSMUSG00000026383	EPB41L5
ENSRNOG00000002539	ENSMUSG00000038015	PRM2
ENSRNOG00000002540	ENSMUSG00000029204	RHOH
ENSRNOG00000002541	ENSMUSG00000029202	PDS5A
ENSRNOG00000002542	ENSMUSG00000000976	HEATR6
ENSRNOG00000002544	ENSMUSG00000026585	KIFAP3
ENSRNOG00000002545	ENSMUSG00000022507	C16orf72
ENSRNOG00000002548	ENSMUSG00000026725	TNN
ENSRNOG00000002553	ENSMUSG00000037822	SMIM14
ENSRNOG00000002555	ENSMUSG00000067001	SERPINB7
ENSRNOG00000002556	ENSMUSG00000025264	TSR2
ENSRNOG00000002563	ENSMUSG00000000355	MCTS1
ENSRNOG00000002564	ENSMUSG00000050058	PRM3
ENSRNOG00000002566	ENSMUSG00000043050	TNP2
ENSRNOG00000002568	ENSMUSG00000038037	SOCS1
ENSRNOG00000002569	ENSMUSG00000058267	MRPS14
ENSRNOG00000002571	ENSMUSG00000039179	TEKT5
ENSRNOG00000002572	ENSMUSG00000014226	CACYBP
ENSRNOG00000002574	ENSMUSG00000022503	NUBP1
ENSRNOG00000002575	ENSMUSG00000020519	SAP30L
ENSRNOG00000002578	ENSMUSG00000044594	SERPINB4
ENSRNOG00000002579	ENSMUSG00000034981	PARM1
ENSRNOG00000002580	ENSMUSG00000053286	TRMT1L
ENSRNOG00000002582	ENSMUSG00000037335	HAND1
ENSRNOG00000002583	ENSMUSG00000026327	SERPINB11
ENSRNOG00000002585	ENSMUSG00000031095	CUL4B
ENSRNOG00000002592	ENSMUSG00000025665	RPS6KA6
ENSRNOG00000002593	ENSMUSG00000026610	ESRRG
ENSRNOG00000002595	ENSMUSG00000036815	DPP10
ENSRNOG00000002597	ENSMUSG00000025396	HSD17B6
ENSRNOG00000002598	ENSMUSG00000020679	HNF1B
ENSRNOG00000002599	ENSMUSG00000004837	GRAPL
ENSRNOG00000002602	ENSMUSG00000059956	SERPINB12
ENSRNOG00000002607	ENSMUSG00000000567	SOX9
ENSRNOG00000002609	ENSMUSG00000057069	ERO1B
ENSRNOG00000002610	ENSMUSG00000008393	CARHSP1
ENSRNOG00000002612	ENSMUSG00000020677	DDX52
ENSRNOG00000002615	ENSMUSG00000022711	PMM2
ENSRNOG00000002616	ENSMUSG00000042371	SLC5A10
ENSRNOG00000002618	ENSMUSG00000023150	IVNS1ABP
ENSRNOG00000002624	ENSMUSG00000095105	EDARADD
ENSRNOG00000002625	ENSMUSG00000026384	PTPN4
ENSRNOG00000002626	ENSMUSG00000056158	CA10
ENSRNOG00000002627	ENSMUSG00000026608	KCTD3
ENSRNOG00000002630	ENSMUSG00000020515	CNOT8
ENSRNOG00000002632	ENSMUSG00000061315	NACA
ENSRNOG00000002635	ENSMUSG00000038055	DEXI
ENSRNOG00000002636	ENSMUSG00000057880	ABAT
ENSRNOG00000002640	ENSMUSG00000067006	SERPINB5
ENSRNOG00000002643	ENSMUSG00000029201	UGDH
ENSRNOG00000002644	ENSMUSG00000054079	UTP18
ENSRNOG00000002645	ENSMUSG00000037275	GEMIN5
ENSRNOG00000002652	ENSMUSG00000038807	RAP1GAP2
ENSRNOG00000002653	ENSMUSG00000037624	KCNK2
ENSRNOG00000002657	ENSMUSG00000056220	PLA2G4A
ENSRNOG00000002659	ENSMUSG00000022504	CIITA
ENSRNOG00000002660	ENSMUSG00000031227	MAGEE1
ENSRNOG00000002662	ENSMUSG00000031226	PBDC1
ENSRNOG00000002664	ENSMUSG00000022505	EMP2
ENSRNOG00000002667	ENSMUSG00000026479	LAMC2
ENSRNOG00000002669	ENSMUSG00000020741	CLUH
ENSRNOG00000002671	ENSMUSG00000020857	NME2
ENSRNOG00000002680	ENSMUSG00000026478	LAMC1
ENSRNOG00000002682	ENSMUSG00000037243	ZNF692
ENSRNOG00000002691	ENSMUSG00000042708	SHCBP1L
ENSRNOG00000002693	ENSMUSG00000037601	NME1
ENSRNOG00000002695	ENSMUSG00000026492	TFB2M
ENSRNOG00000002697	ENSMUSG00000015214	MTMR1
ENSRNOG00000002701	ENSMUSG00000022821	HGD
ENSRNOG00000002705	ENSMUSG00000009907	VPS4B
ENSRNOG00000002708	ENSMUSG00000041229	PHF8
ENSRNOG00000002710	ENSMUSG00000038949	CNST
ENSRNOG00000002711	ENSMUSG00000026683	NUF2
ENSRNOG00000002713	ENSMUSG00000049755	ZNF672
ENSRNOG00000002714	ENSMUSG00000039345	METTL22
ENSRNOG00000002718	ENSMUSG00000064057	SCGB3A1
ENSRNOG00000002721	ENSMUSG00000022820	NDUFB4
ENSRNOG00000002722	ENSMUSG00000020823	SEC14L1
ENSRNOG00000002723	ENSMUSG00000026582	SELE
ENSRNOG00000002724	ENSMUSG00000020528	PRPSAP2
ENSRNOG00000002728	ENSMUSG00000082361	BTC
ENSRNOG00000002730	ENSMUSG00000026678	RGS5
ENSRNOG00000002735	ENSMUSG00000042699	DHX9
ENSRNOG00000002736	ENSMUSG00000026721	RABGAP1L
ENSRNOG00000002746	ENSMUSG00000022816	FSTL1
ENSRNOG00000002748	ENSMUSG00000020925	CCDC43
ENSRNOG00000002749	ENSMUSG00000020859	SPAG9
ENSRNOG00000002751	ENSMUSG00000033906	ZDHHC15
ENSRNOG00000002753	ENSMUSG00000020926	ADAM11
ENSRNOG00000002754	ENSMUSG00000029378	AREG
ENSRNOG00000002755	ENSMUSG00000020745	PAFAH1B1
ENSRNOG00000002757	ENSMUSG00000018651	TADA2A
ENSRNOG00000002759	ENSMUSG00000029199	LIAS
ENSRNOG00000002763	ENSMUSG00000004798	ULK2
ENSRNOG00000002764	ENSMUSG00000010554	METTL16
ENSRNOG00000002767	ENSMUSG00000000881	DLG3
ENSRNOG00000002768	ENSMUSG00000022715	TMEM114
ENSRNOG00000002771	ENSMUSG00000029377	EREG
ENSRNOG00000002773	ENSMUSG00000038530	RGS4
ENSRNOG00000002775	ENSMUSG00000042684	NPL
ENSRNOG00000002776	ENSMUSG00000026581	SELL
ENSRNOG00000002778	ENSMUSG00000018697	AATF
ENSRNOG00000002781	ENSMUSG00000009905	KDSR
ENSRNOG00000002782	ENSMUSG00000035020	EPGN
ENSRNOG00000002783	ENSMUSG00000026715	SERPINC1
ENSRNOG00000002784	ENSMUSG00000056854	POU3F4
ENSRNOG00000002790	ENSMUSG00000031333	ABCB7
ENSRNOG00000002791	ENSMUSG00000057329	BCL2
ENSRNOG00000002793	ENSMUSG00000047904	SSTR2
ENSRNOG00000002794	ENSMUSG00000026580	SELP
ENSRNOG00000002795	ENSMUSG00000018661	COG1
ENSRNOG00000002797	ENSMUSG00000046961	GPR156
ENSRNOG00000002800	ENSMUSG00000019359	GDPD2
ENSRNOG00000002810	ENSMUSG00000020363	GFPT2
ENSRNOG00000002811	ENSMUSG00000035131	BRINP3
ENSRNOG00000002812	ENSMUSG00000018698	LHX1
ENSRNOG00000002813	ENSMUSG00000026709	DARS2
ENSRNOG00000002814	ENSMUSG00000020928	HIGD1B
ENSRNOG00000002818	ENSMUSG00000020929	EFTUD2
ENSRNOG00000002821	ENSMUSG00000044340	PHLPP1
ENSRNOG00000002823	ENSMUSG00000020366	MAPK9
ENSRNOG00000002824	ENSMUSG00000056537	RLIM
ENSRNOG00000002826	ENSMUSG00000026675	HSD17B7
ENSRNOG00000002827	ENSMUSG00000008658	RBFOX1
ENSRNOG00000002828	ENSMUSG00000037573	TOB1
ENSRNOG00000002829	ENSMUSG00000029372	PPBP
ENSRNOG00000002831	ENSMUSG00000044177	WFIKKN2
ENSRNOG00000002832	ENSMUSG00000033965	SLC16A2
ENSRNOG00000002833	ENSMUSG00000022812	GSK3B
ENSRNOG00000002834	ENSMUSG00000029195	KLB
ENSRNOG00000002835	ENSMUSG00000020863	LUC7L3
ENSRNOG00000002838	ENSMUSG00000015668	PDZD11
ENSRNOG00000002839	ENSMUSG00000040918	SLC19A2
ENSRNOG00000002841	ENSMUSG00000026490	CDC42BPA
ENSRNOG00000002843	ENSMUSG00000029371	CXCL6
ENSRNOG00000002844	ENSMUSG00000046269	USP27X
ENSRNOG00000002848	ENSMUSG00000025037	MAOA
ENSRNOG00000002852	ENSMUSG00000020527	MYO19
ENSRNOG00000002855	ENSMUSG00000029191	RFC1
ENSRNOG00000002858	ENSMUSG00000043880	OR11L1
ENSRNOG00000002860	ENSMUSG00000026578	CCDC181
ENSRNOG00000002862	ENSMUSG00000004317	CLCN5
ENSRNOG00000002863	ENSMUSG00000004110	CACNA1E
ENSRNOG00000002864	ENSMUSG00000001910	NACC1
ENSRNOG00000002866	ENSMUSG00000029370	RASSF6
ENSRNOG00000002871	ENSMUSG00000010608	RBM25
ENSRNOG00000002873	ENSMUSG00000049154	FAM183A
ENSRNOG00000002875	ENSMUSG00000026705	KLHL20
ENSRNOG00000002876	ENSMUSG00000022544	FAM86C1
ENSRNOG00000002878	ENSMUSG00000029369	AFM
ENSRNOG00000002879	ENSMUSG00000010609	PSEN2
ENSRNOG00000002881	ENSMUSG00000026674	DDR2
ENSRNOG00000002882	ENSMUSG00000038866	ZCCHC2
ENSRNOG00000002883	ENSMUSG00000039427	ALG1L2
ENSRNOG00000002884	ENSMUSG00000026577	BLZF1
ENSRNOG00000002886	ENSMUSG00000020900	MYH10
ENSRNOG00000002889	ENSMUSG00000054932	AFP
ENSRNOG00000002890	ENSMUSG00000044835	ANKRD45
ENSRNOG00000002894	ENSMUSG00000000282	MNT
ENSRNOG00000002895	ENSMUSG00000023143	NAGPA
ENSRNOG00000002896	ENSMUSG00000026701	PRDX6
ENSRNOG00000002898	ENSMUSG00000026575	NME7
ENSRNOG00000002899	ENSMUSG00000047804	AKAP10
ENSRNOG00000002903	ENSMUSG00000042331	SPECC1
ENSRNOG00000002904	ENSMUSG00000060890	ARR3
ENSRNOG00000002905	ENSMUSG00000020930	CCDC103
ENSRNOG00000002906	ENSMUSG00000022809	NR1I2
ENSRNOG00000002908	ENSMUSG00000033272	SLC35A4
ENSRNOG00000002911	ENSMUSG00000029368	ALB
ENSRNOG00000002912	ENSMUSG00000022685	PARN
ENSRNOG00000002914	ENSMUSG00000001909	TRMT1
ENSRNOG00000002915	ENSMUSG00000020455	TRIM11
ENSRNOG00000002916	ENSMUSG00000000805	CA4
ENSRNOG00000002917	ENSMUSG00000091712	SEC14L5
ENSRNOG00000002919	ENSMUSG00000020932	GFAP
ENSRNOG00000002921	ENSMUSG00000050089	AKAP4
ENSRNOG00000002922	ENSMUSG00000018500	ADORA2B
ENSRNOG00000002923	ENSMUSG00000031330	ZCCHC13
ENSRNOG00000002926	ENSMUSG00000026670	UAP1
ENSRNOG00000002928	ENSMUSG00000020444	GUK1
ENSRNOG00000002930	ENSMUSG00000039457	PPL
ENSRNOG00000002932	ENSMUSG00000037890	WDR19
ENSRNOG00000002934	ENSMUSG00000026576	ATP1B1
ENSRNOG00000002935	ENSMUSG00000020864	ANKRD40
ENSRNOG00000002936	ENSMUSG00000098306	GOLT1A
ENSRNOG00000002937	ENSMUSG00000070645	REN
ENSRNOG00000002940	ENSMUSG00000055204	ANKRD17
ENSRNOG00000002941	ENSMUSG00000026667	UHMK1
ENSRNOG00000002943	ENSMUSG00000036860	MRPL55
ENSRNOG00000002944	ENSMUSG00000020441	C1orf35
ENSRNOG00000002946	ENSMUSG00000053113	SOCS3
ENSRNOG00000002947	ENSMUSG00000026574	DPT
ENSRNOG00000002948	ENSMUSG00000020865	ABCC3
ENSRNOG00000002949	ENSMUSG00000017715	PGS1
ENSRNOG00000002950	ENSMUSG00000034041	LYL1
ENSRNOG00000002951	ENSMUSG00000051592	CCNB3
ENSRNOG00000002953	ENSMUSG00000044359	P2RY4
ENSRNOG00000002956	ENSMUSG00000039156	STIM2
ENSRNOG00000002959	ENSMUSG00000068270	SHROOM4
ENSRNOG00000002960	ENSMUSG00000040138	NDP
ENSRNOG00000002963	ENSMUSG00000045532	C1QL1
ENSRNOG00000002964	ENSMUSG00000026573	XCL1
ENSRNOG00000002968	ENSMUSG00000026700	TNFSF4
ENSRNOG00000002969	ENSMUSG00000038855	ITPKB
ENSRNOG00000002970	ENSMUSG00000014243	ZSWIM7
ENSRNOG00000002972	ENSMUSG00000042800	SPATA46
ENSRNOG00000002974	ENSMUSG00000031326	CDX4
ENSRNOG00000002976	ENSMUSG00000022805	MAATS1
ENSRNOG00000002977	ENSMUSG00000042298	TTC19
ENSRNOG00000002978	ENSMUSG00000000817	FASLG
ENSRNOG00000002979	ENSMUSG00000026572	TBX19
ENSRNOG00000002980	ENSMUSG00000038335	TSR1
ENSRNOG00000002983	ENSMUSG00000001911	NFIX
ENSRNOG00000002984	ENSMUSG00000023279	BMP15
ENSRNOG00000002986	ENSMUSG00000025038	EFHC2
ENSRNOG00000002989	ENSMUSG00000020936	NMT1
ENSRNOG00000002991	ENSMUSG00000001323	SRR
ENSRNOG00000002997	ENSMUSG00000002504	SLC9A3R2
ENSRNOG00000002999	ENSMUSG00000002846	TIMMDC1
ENSRNOG00000003003	ENSMUSG00000039178	TBC1D19
ENSRNOG00000003005	ENSMUSG00000020374	RASGEF1C
ENSRNOG00000003011	ENSMUSG00000033751	GADD45GIP1
ENSRNOG00000003013	ENSMUSG00000031174	RPGR
ENSRNOG00000003014	ENSMUSG00000034064	POGLUT1
ENSRNOG00000003018	ENSMUSG00000038463	OLFML2B
ENSRNOG00000003019	ENSMUSG00000039473	UBN1
ENSRNOG00000003020	ENSMUSG00000048856	SLC25A47
ENSRNOG00000003026	ENSMUSG00000003813	RAD23A
ENSRNOG00000003028	ENSMUSG00000033987	DNAH17
ENSRNOG00000003029	ENSMUSG00000003814	CALR
ENSRNOG00000003030	ENSMUSG00000031220	AWAT2
ENSRNOG00000003031	ENSMUSG00000026463	ATP2B4
ENSRNOG00000003033	ENSMUSG00000020937	PLCD3
ENSRNOG00000003038	ENSMUSG00000040848	SFT2D2
ENSRNOG00000003039	ENSMUSG00000009900	WNT3A
ENSRNOG00000003041	ENSMUSG00000038290	SMG6
ENSRNOG00000003048	ENSMUSG00000040843	TIPRL
ENSRNOG00000003049	ENSMUSG00000025260	HSD17B10
ENSRNOG00000003050	ENSMUSG00000036644	TBC1D9B
ENSRNOG00000003052	ENSMUSG00000035505	COX18
ENSRNOG00000003059	ENSMUSG00000010311	OPTC
ENSRNOG00000003063	ENSMUSG00000034055	PHKA1
ENSRNOG00000003064	ENSMUSG00000029082	BST1
ENSRNOG00000003065	ENSMUSG00000022536	GLYR1
ENSRNOG00000003066	ENSMUSG00000000126	WNT9A
ENSRNOG00000003067	ENSMUSG00000035528	NPFFR2
ENSRNOG00000003068	ENSMUSG00000020381	MRNIP
ENSRNOG00000003069	ENSMUSG00000029084	CD38
ENSRNOG00000003070	ENSMUSG00000014245	PIGL
ENSRNOG00000003071	ENSMUSG00000026696	VAMP4
ENSRNOG00000003073	ENSMUSG00000040836	GPR161
ENSRNOG00000003075	ENSMUSG00000002845	TMEM39A
ENSRNOG00000003076	ENSMUSG00000040043	RBMS2
ENSRNOG00000003078	ENSMUSG00000026571	DCAF6
ENSRNOG00000003080	ENSMUSG00000030611	MRPS11
ENSRNOG00000003081	ENSMUSG00000025257	RIBC1
ENSRNOG00000003084	ENSMUSG00000026496	PARP1
ENSRNOG00000003085	ENSMUSG00000044597	MYCN
ENSRNOG00000003086	ENSMUSG00000018509	CENPV
ENSRNOG00000003088	ENSMUSG00000022799	ARHGAP31
ENSRNOG00000003095	ENSMUSG00000048373	FGFBP1
ENSRNOG00000003098	ENSMUSG00000029086	PROM1
ENSRNOG00000003099	ENSMUSG00000050148	UBQLN2
ENSRNOG00000003100	ENSMUSG00000026659	DUSP12
ENSRNOG00000003104	ENSMUSG00000018507	TRPV2
ENSRNOG00000003105	ENSMUSG00000010021	KIF19
ENSRNOG00000003108	ENSMUSG00000056938	ACBD4
ENSRNOG00000003109	ENSMUSG00000000202	BTBD17
ENSRNOG00000003110	ENSMUSG00000061392	MAGEB5
ENSRNOG00000003114	ENSMUSG00000022793	B4GALT4
ENSRNOG00000003116	ENSMUSG00000078789	DPH1
ENSRNOG00000003117	ENSMUSG00000020720	PSMD12
ENSRNOG00000003119	ENSMUSG00000035540	GC
ENSRNOG00000003120	ENSMUSG00000041577	PRELP
ENSRNOG00000003121	ENSMUSG00000045287	RTN4RL1
ENSRNOG00000003122	ENSMUSG00000067567	HDAC8
ENSRNOG00000003123	ENSMUSG00000000751	RPA1
ENSRNOG00000003125	ENSMUSG00000022540	ROGDI
ENSRNOG00000003127	ENSMUSG00000051346	SPRYD4
ENSRNOG00000003129	ENSMUSG00000020472	ZNF496
ENSRNOG00000003131	ENSMUSG00000052752	TRAF7
ENSRNOG00000003132	ENSMUSG00000025389	MIP
ENSRNOG00000003134	ENSMUSG00000060961	SLC4A4
ENSRNOG00000003135	ENSMUSG00000070524	FCRLB
ENSRNOG00000003136	ENSMUSG00000038421	FCRLA
ENSRNOG00000003139	ENSMUSG00000041133	SMC1A
ENSRNOG00000003143	ENSMUSG00000018479	C17orf64
ENSRNOG00000003144	ENSMUSG00000051043	GPRC5C
ENSRNOG00000003147	ENSMUSG00000015837	SQSTM1
ENSRNOG00000003148	ENSMUSG00000017466	TIMP2
ENSRNOG00000003149	ENSMUSG00000003808	FARSA
ENSRNOG00000003150	ENSMUSG00000026568	MPC2
ENSRNOG00000003151	ENSMUSG00000022684	BFAR
ENSRNOG00000003160	ENSMUSG00000041658	RRAGB
ENSRNOG00000003163	ENSMUSG00000058076	SDHC
ENSRNOG00000003164	ENSMUSG00000022683	PLA2G10
ENSRNOG00000003170	ENSMUSG00000032691	NLRP3
ENSRNOG00000003171	ENSMUSG00000056569	MPZ
ENSRNOG00000003172	ENSMUSG00000000753	SERPINF1
ENSRNOG00000003174	ENSMUSG00000046985	TAPT1
ENSRNOG00000003176	ENSMUSG00000026497	MIXL1
ENSRNOG00000003177	ENSMUSG00000042032	MAT2B
ENSRNOG00000003178	ENSMUSG00000047238	MAGEH1
ENSRNOG00000003183	ENSMUSG00000041559	FMOD
ENSRNOG00000003185	ENSMUSG00000026499	ACBD3
ENSRNOG00000003186	ENSMUSG00000022515	ANKS3
ENSRNOG00000003187	ENSMUSG00000072969	ARMCX5
ENSRNOG00000003189	ENSMUSG00000051159	CITED1
ENSRNOG00000003191	ENSMUSG00000072964	ARMCX5-GPRASP2
ENSRNOG00000003195	ENSMUSG00000033597	CASKIN1
ENSRNOG00000003203	ENSMUSG00000048878	HEXIM1
ENSRNOG00000003205	ENSMUSG00000039706	LDB2
ENSRNOG00000003206	ENSMUSG00000026341	ACTR3
ENSRNOG00000003207	ENSMUSG00000055805	FMNL1
ENSRNOG00000003208	ENSMUSG00000051220	ERCC6L
ENSRNOG00000003209	ENSMUSG00000038370	PCP4L1
ENSRNOG00000003211	ENSMUSG00000026511	SRP9
ENSRNOG00000003213	ENSMUSG00000020721	HELZ
ENSRNOG00000003215	ENSMUSG00000005267	ZNF287
ENSRNOG00000003217	ENSMUSG00000033880	LGALS3BP
ENSRNOG00000003218	ENSMUSG00000047342	ZNF286A
ENSRNOG00000003219	ENSMUSG00000047821	TRIM16L
ENSRNOG00000003221	ENSMUSG00000026697	MYOC
ENSRNOG00000003223	ENSMUSG00000038633	DEGS1
ENSRNOG00000003224	ENSMUSG00000022516	NUDT16L1
ENSRNOG00000003226	ENSMUSG00000005417	MPRIP
ENSRNOG00000003228	ENSMUSG00000008035	MID1IP1
ENSRNOG00000003229	ENSMUSG00000058254	TSPAN7
ENSRNOG00000003232	ENSMUSG00000020733	SLC9A3R1
ENSRNOG00000003233	ENSMUSG00000038224	SERPINF2
ENSRNOG00000003234	ENSMUSG00000022517	MGRN1
ENSRNOG00000003235	ENSMUSG00000036620	MGAT4B
ENSRNOG00000003237	ENSMUSG00000026510	TP53BP2
ENSRNOG00000003239	ENSMUSG00000025575	CANT1
ENSRNOG00000003241	ENSMUSG00000020436	GABRG2
ENSRNOG00000003242	ENSMUSG00000056870	GULP1
ENSRNOG00000003243	ENSMUSG00000045374	WDR81
ENSRNOG00000003244	ENSMUSG00000020377	LTC4S
ENSRNOG00000003245	ENSMUSG00000020722	CACNG1
ENSRNOG00000003247	ENSMUSG00000038806	SDE2
ENSRNOG00000003248	ENSMUSG00000026566	MPZL1
ENSRNOG00000003251	ENSMUSG00000033849	B3GALT2
ENSRNOG00000003253	ENSMUSG00000015806	QDPR
ENSRNOG00000003254	ENSMUSG00000025383	IL23A
ENSRNOG00000003256	ENSMUSG00000020326	CCNG1
ENSRNOG00000003258	ENSMUSG00000026361	CDC73
ENSRNOG00000003259	ENSMUSG00000017446	C1QTNF1
ENSRNOG00000003260	ENSMUSG00000005677	NR1I3
ENSRNOG00000003261	ENSMUSG00000031010	USP9X
ENSRNOG00000003262	ENSMUSG00000020723	CACNG4
ENSRNOG00000003263	ENSMUSG00000038793	LEFTY1
ENSRNOG00000003264	ENSMUSG00000015542	NAT9
ENSRNOG00000003267	ENSMUSG00000026520	PYCR2
ENSRNOG00000003268	ENSMUSG00000050567	MAML1
ENSRNOG00000003269	ENSMUSG00000015575	ATP6V0E1
ENSRNOG00000003273	ENSMUSG00000020867	SPATA20
ENSRNOG00000003275	ENSMUSG00000044787	SPATA32
ENSRNOG00000003276	ENSMUSG00000035441	MYO1D
ENSRNOG00000003278	ENSMUSG00000020941	MAP3K14
ENSRNOG00000003279	ENSMUSG00000003824	SYCE2
ENSRNOG00000003280	ENSMUSG00000020734	GRIN2C
ENSRNOG00000003281	ENSMUSG00000058298	MCM9
ENSRNOG00000003283	ENSMUSG00000040723	RCSD1
ENSRNOG00000003284	ENSMUSG00000010080	EPN3
ENSRNOG00000003285	ENSMUSG00000022679	MPV17L
ENSRNOG00000003287	ENSMUSG00000090173	FBXW10
ENSRNOG00000003288	ENSMUSG00000040373	CACNG5
ENSRNOG00000003289	ENSMUSG00000039682	LAP3
ENSRNOG00000003291	ENSMUSG00000040713	CREG1
ENSRNOG00000003294	ENSMUSG00000042200	CDRT4
ENSRNOG00000003296	ENSMUSG00000029366	DCK
ENSRNOG00000003298	ENSMUSG00000005763	CD247
ENSRNOG00000003300	ENSMUSG00000020423	BTG2
ENSRNOG00000003302	ENSMUSG00000032633	FLCN
ENSRNOG00000003304	ENSMUSG00000039084	CHAD
ENSRNOG00000003305	ENSMUSG00000050232	CXCR3
ENSRNOG00000003307	ENSMUSG00000003809	GCDH
ENSRNOG00000003310	ENSMUSG00000026519	TMEM63A
ENSRNOG00000003313	ENSMUSG00000018589	GLRA2
ENSRNOG00000003326	ENSMUSG00000022682	RRN3
ENSRNOG00000003328	ENSMUSG00000004071	CDIP1
ENSRNOG00000003329	ENSMUSG00000020525	PPM1D
ENSRNOG00000003330	ENSMUSG00000076435	ACSF2
ENSRNOG00000003332	ENSMUSG00000032615	NT5M
ENSRNOG00000003334	ENSMUSG00000073700	KLHL21
ENSRNOG00000003336	ENSMUSG00000042451	MYBPH
ENSRNOG00000003338	ENSMUSG00000018217	PMP22
ENSRNOG00000003342	ENSMUSG00000028261	NDUFAF4
ENSRNOG00000003343	ENSMUSG00000020368	CANX
ENSRNOG00000003346	ENSMUSG00000047757	FANCB
ENSRNOG00000003347	ENSMUSG00000052012	OR10P1
ENSRNOG00000003348	ENSMUSG00000049892	RASD1
ENSRNOG00000003349	ENSMUSG00000063564	COL23A1
ENSRNOG00000003350	ENSMUSG00000061778	MOSPD2
ENSRNOG00000003354	ENSMUSG00000034732	PABPC5
ENSRNOG00000003357	ENSMUSG00000026043	COL3A1
ENSRNOG00000003359	ENSMUSG00000034160	OGT
ENSRNOG00000003365	ENSMUSG00000005338	CADM3
ENSRNOG00000003367	ENSMUSG00000050270	TMEM220
ENSRNOG00000003370	ENSMUSG00000031173	OTC
ENSRNOG00000003374	ENSMUSG00000032878	CCDC85A
ENSRNOG00000003384	ENSMUSG00000070407	HS3ST3B1
ENSRNOG00000003386	ENSMUSG00000025576	RBFOX3
ENSRNOG00000003388	ENSMUSG00000026605	CENPF
ENSRNOG00000003392	ENSMUSG00000044221	GRSF1
ENSRNOG00000003395	ENSMUSG00000050087	CBY3
ENSRNOG00000003397	ENSMUSG00000020910	ADPRM
ENSRNOG00000003398	ENSMUSG00000005674	TOMM40L
ENSRNOG00000003399	ENSMUSG00000007850	HNRNPH1
ENSRNOG00000003400	ENSMUSG00000026692	FMO4
ENSRNOG00000003402	ENSMUSG00000026470	STX6
ENSRNOG00000003403	ENSMUSG00000026342	SLC35F5
ENSRNOG00000003407	ENSMUSG00000026604	PTPN14
ENSRNOG00000003409	ENSMUSG00000057615	LDOC1
ENSRNOG00000003424	ENSMUSG00000020549	ELAC2
ENSRNOG00000003428	ENSMUSG00000029291	RUFY3
ENSRNOG00000003430	ENSMUSG00000031138	F9
ENSRNOG00000003435	ENSMUSG00000031139	MCF2
ENSRNOG00000003439	ENSMUSG00000031712	IL15
ENSRNOG00000003442	ENSMUSG00000042429	ADORA1
ENSRNOG00000003443	ENSMUSG00000054191	KLF1
ENSRNOG00000003452	ENSMUSG00000031384	ASB9
ENSRNOG00000003453	ENSMUSG00000026344	LYPD1
ENSRNOG00000003455	ENSMUSG00000062012	ZNF205
ENSRNOG00000003456	ENSMUSG00000046615	ACTRT1
ENSRNOG00000003457	ENSMUSG00000043782	BICDL2
ENSRNOG00000003461	ENSMUSG00000031711	ZNF330
ENSRNOG00000003463	ENSMUSG00000020538	SREBF1
ENSRNOG00000003464	ENSMUSG00000034586	HID1
ENSRNOG00000003468	ENSMUSG00000038599	CAPN8
ENSRNOG00000003469	ENSMUSG00000053693	MAST1
ENSRNOG00000003470	ENSMUSG00000025040	FUNDC1
ENSRNOG00000003472	ENSMUSG00000062949	ATP11C
ENSRNOG00000003476	ENSMUSG00000020838	SLC6A4
ENSRNOG00000003479	ENSMUSG00000047747	RNF150
ENSRNOG00000003480	ENSMUSG00000037860	AIM2
ENSRNOG00000003486	ENSMUSG00000026536	IFI16
ENSRNOG00000003491	ENSMUSG00000050965	PRKCA
ENSRNOG00000003494	ENSMUSG00000026458	PPFIA4
ENSRNOG00000003495	ENSMUSG00000020850	PRPF8
ENSRNOG00000003496	ENSMUSG00000031709	TBC1D9
ENSRNOG00000003497	ENSMUSG00000041319	THOC6
ENSRNOG00000003500	ENSMUSG00000005681	APOA2
ENSRNOG00000003501	ENSMUSG00000020945	LYZL6
ENSRNOG00000003504	ENSMUSG00000052926	RNASEH2A
ENSRNOG00000003506	ENSMUSG00000020946	GOSR2
ENSRNOG00000003508	ENSMUSG00000001576	ERGIC1
ENSRNOG00000003509	ENSMUSG00000050134	OR6N2
ENSRNOG00000003510	ENSMUSG00000040170	FMO2
ENSRNOG00000003512	ENSMUSG00000010803	GABRA1
ENSRNOG00000003515	ENSMUSG00000038776	EPHX1
ENSRNOG00000003517	ENSMUSG00000000093	TBX2
ENSRNOG00000003518	ENSMUSG00000046486	OR6K6
ENSRNOG00000003520	ENSMUSG00000005161	PRDX2
ENSRNOG00000003521	ENSMUSG00000051528	OR6K3
ENSRNOG00000003522	ENSMUSG00000026471	MR1
ENSRNOG00000003524	ENSMUSG00000020869	LRRC59
ENSRNOG00000003526	ENSMUSG00000031255	SYTL4
ENSRNOG00000003533	ENSMUSG00000000605	CLCN4
ENSRNOG00000003536	ENSMUSG00000020375	RUFY1
ENSRNOG00000003537	ENSMUSG00000026532	SPTA1
ENSRNOG00000003538	ENSMUSG00000006403	ADAMTS4
ENSRNOG00000003541	ENSMUSG00000024477	PGGT1B
ENSRNOG00000003542	ENSMUSG00000023904	HCFC1R1
ENSRNOG00000003543	ENSMUSG00000025333	GPR143
ENSRNOG00000003544	ENSMUSG00000000094	TBX4
ENSRNOG00000003545	ENSMUSG00000018189	UCHL5
ENSRNOG00000003546	ENSMUSG00000023905	TNFRSF12A
ENSRNOG00000003548	ENSMUSG00000061787	RPS17
ENSRNOG00000003550	ENSMUSG00000033701	ACBD6
ENSRNOG00000003551	ENSMUSG00000052423	B4GALT3
ENSRNOG00000003553	ENSMUSG00000020467	EFEMP1
ENSRNOG00000003554	ENSMUSG00000031381	PIGA
ENSRNOG00000003555	ENSMUSG00000050788	OR10Z1
ENSRNOG00000003559	ENSMUSG00000071855	CCDC112
ENSRNOG00000003560	ENSMUSG00000051509	OR6Y1
ENSRNOG00000003562	ENSMUSG00000038576	SUSD4
ENSRNOG00000003563	ENSMUSG00000020840	BLMH
ENSRNOG00000003566	ENSMUSG00000000049	APOH
ENSRNOG00000003567	ENSMUSG00000062729	PPOX
ENSRNOG00000003569	ENSMUSG00000020428	GABRA6
ENSRNOG00000003576	ENSMUSG00000018068	INTS2
ENSRNOG00000003578	ENSMUSG00000033319	FEM1C
ENSRNOG00000003580	ENSMUSG00000031710	UCP1
ENSRNOG00000003581	ENSMUSG00000026565	POU2F1
ENSRNOG00000003583	ENSMUSG00000026603	SMYD2
ENSRNOG00000003585	ENSMUSG00000054453	SYTL5
ENSRNOG00000003587	ENSMUSG00000031380	VEGFD
ENSRNOG00000003590	ENSMUSG00000000538	TOM1L2
ENSRNOG00000003592	ENSMUSG00000015804	MED28
ENSRNOG00000003594	ENSMUSG00000042305	TMEM183A
ENSRNOG00000003595	ENSMUSG00000026468	LHX4
ENSRNOG00000003596	ENSMUSG00000031312	ITGB1BP2
ENSRNOG00000003597	ENSMUSG00000026202	TUBA4A
ENSRNOG00000003599	ENSMUSG00000070697	UTP3
ENSRNOG00000003600	ENSMUSG00000020464	PNPT1
ENSRNOG00000003603	ENSMUSG00000033389	ARHGAP44
ENSRNOG00000003611	ENSMUSG00000031176	DYNLT3
ENSRNOG00000003613	ENSMUSG00000035299	MID1
ENSRNOG00000003614	ENSMUSG00000036155	MGAT5
ENSRNOG00000003616	ENSMUSG00000050069	GREM2
ENSRNOG00000003620	ENSMUSG00000026691	FMO3
ENSRNOG00000003622	ENSMUSG00000015340	CYBB
ENSRNOG00000003625	ENSMUSG00000026353	UBXN4
ENSRNOG00000003629	ENSMUSG00000026516	NVL
ENSRNOG00000003633	ENSMUSG00000020907	RCVRN
ENSRNOG00000003634	ENSMUSG00000020364	ZNF354A
ENSRNOG00000003635	ENSMUSG00000030768	DISP1
ENSRNOG00000003643	ENSMUSG00000035476	TAB3
ENSRNOG00000003645	ENSMUSG00000020358	HNRNPAB
ENSRNOG00000003648	ENSMUSG00000023906	CLDN6
ENSRNOG00000003649	ENSMUSG00000033684	QSOX1
ENSRNOG00000003650	ENSMUSG00000020736	NT5C
ENSRNOG00000003653	ENSMUSG00000026526	FH
ENSRNOG00000003654	ENSMUSG00000066720	CLDN9
ENSRNOG00000003657	ENSMUSG00000023908	PKMYT1
ENSRNOG00000003666	ENSMUSG00000067149	JCHAIN
ENSRNOG00000003669	ENSMUSG00000020542	MYOCD
ENSRNOG00000003671	ENSMUSG00000044542	PROP1
ENSRNOG00000003672	ENSMUSG00000029286	ENAM
ENSRNOG00000003673	ENSMUSG00000020739	NUP85
ENSRNOG00000003674	ENSMUSG00000031379	PIR
ENSRNOG00000003675	ENSMUSG00000041552	PTCHD1
ENSRNOG00000003679	ENSMUSG00000034297	MED13
ENSRNOG00000003680	ENSMUSG00000007653	GABRB2
ENSRNOG00000003681	ENSMUSG00000026354	LCT
ENSRNOG00000003682	ENSMUSG00000052566	HOOK2
ENSRNOG00000003683	ENSMUSG00000049928	GLP2R
ENSRNOG00000003686	ENSMUSG00000025246	TBL1X
ENSRNOG00000003687	ENSMUSG00000026360	RGS2
ENSRNOG00000003688	ENSMUSG00000055357	CAPZA1
ENSRNOG00000003689	ENSMUSG00000031311	NONO
ENSRNOG00000003691	ENSMUSG00000033184	TMED7
ENSRNOG00000003694	ENSMUSG00000010175	PROX1
ENSRNOG00000003695	ENSMUSG00000035057	MGAT4D
ENSRNOG00000003698	ENSMUSG00000071890	MROH9
ENSRNOG00000003699	ENSMUSG00000039850	ENDOV
ENSRNOG00000003703	ENSMUSG00000026355	MCM6
ENSRNOG00000003704	ENSMUSG00000015879	FAM184B
ENSRNOG00000003705	ENSMUSG00000031377	BMX
ENSRNOG00000003706	ENSMUSG00000062963	UFC1
ENSRNOG00000003707	ENSMUSG00000031310	ZMYM3
ENSRNOG00000003709	ENSMUSG00000039783	KMO
ENSRNOG00000003712	ENSMUSG00000020463	PPP4R3B
ENSRNOG00000003714	ENSMUSG00000020385	CLK4
ENSRNOG00000003715	ENSMUSG00000031253	SRPX2
ENSRNOG00000003716	ENSMUSG00000026630	BATF3
ENSRNOG00000003717	ENSMUSG00000062169	CNIH4
ENSRNOG00000003718	ENSMUSG00000029288	AMBN
ENSRNOG00000003719	ENSMUSG00000042709	ATPAF2
ENSRNOG00000003720	ENSMUSG00000026586	PRRX1
ENSRNOG00000003721	ENSMUSG00000023909	PAQR4
ENSRNOG00000003722	ENSMUSG00000026564	DUSP27
ENSRNOG00000003723	ENSMUSG00000038733	WDR26
ENSRNOG00000003724	ENSMUSG00000024414	MRPL27
ENSRNOG00000003726	ENSMUSG00000000037	SCML2
ENSRNOG00000003728	ENSMUSG00000020868	XYLT2
ENSRNOG00000003732	ENSMUSG00000047414	FLRT2
ENSRNOG00000003734	ENSMUSG00000046668	CXXC5
ENSRNOG00000003736	ENSMUSG00000026042	COL5A2
ENSRNOG00000003737	ENSMUSG00000052819	BEST2
ENSRNOG00000003738	ENSMUSG00000026609	USH2A
ENSRNOG00000003740	ENSMUSG00000000544	GPA33
ENSRNOG00000003741	ENSMUSG00000025582	NPTX1
ENSRNOG00000003742	ENSMUSG00000031292	CDKL5
ENSRNOG00000003745	ENSMUSG00000026628	ATF3
ENSRNOG00000003746	ENSMUSG00000047797	GJB1
ENSRNOG00000003748	ENSMUSG00000025058	CXorf21
ENSRNOG00000003749	ENSMUSG00000015342	XK
ENSRNOG00000003755	ENSMUSG00000002190	CLGN
ENSRNOG00000003756	ENSMUSG00000047344	LANCL3
ENSRNOG00000003759	ENSMUSG00000021003	GALC
ENSRNOG00000003762	ENSMUSG00000031099	SMARCA1
ENSRNOG00000003763	ENSMUSG00000025289	PRDX4
ENSRNOG00000003765	ENSMUSG00000025056	NR0B1
ENSRNOG00000003767	ENSMUSG00000089872	RPS6KC1
ENSRNOG00000003769	ENSMUSG00000026347	TMEM163
ENSRNOG00000003772	ENSMUSG00000020186	CSRP2
ENSRNOG00000003773	ENSMUSG00000004070	HMOX2
ENSRNOG00000003776	ENSMUSG00000029282	AMTN
ENSRNOG00000003777	ENSMUSG00000014609	CHRNE
ENSRNOG00000003778	ENSMUSG00000026525	OPN3
ENSRNOG00000003779	ENSMUSG00000013973	DEDD
ENSRNOG00000003781	ENSMUSG00000055415	ATP10B
ENSRNOG00000003782	ENSMUSG00000025287	ACOT9
ENSRNOG00000003784	ENSMUSG00000038195	RILP
ENSRNOG00000003785	ENSMUSG00000020905	USP43
ENSRNOG00000003786	ENSMUSG00000067377	TSPAN6
ENSRNOG00000003787	ENSMUSG00000015882	LCORL
ENSRNOG00000003790	ENSMUSG00000040629	MAEL
ENSRNOG00000003792	ENSMUSG00000064127	MED14
ENSRNOG00000003794	ENSMUSG00000063445	NMRAL1
ENSRNOG00000003795	ENSMUSG00000026634	ANGEL2
ENSRNOG00000003797	ENSMUSG00000046756	MRPS7
ENSRNOG00000003800	ENSMUSG00000020599	RGS9
ENSRNOG00000003802	ENSMUSG00000020415	PTTG2
ENSRNOG00000003803	ENSMUSG00000035798	ZDHHC17
ENSRNOG00000003805	ENSMUSG00000020521	RNFT1
ENSRNOG00000003806	ENSMUSG00000021886	GPR65
ENSRNOG00000003807	ENSMUSG00000018486	WNT9B
ENSRNOG00000003809	ENSMUSG00000025283	SAT1
ENSRNOG00000003812	ENSMUSG00000031302	NLGN3
ENSRNOG00000003813	ENSMUSG00000033854	KCNK10
ENSRNOG00000003815	ENSMUSG00000014606	SLC25A11
ENSRNOG00000003816	ENSMUSG00000026563	TADA1
ENSRNOG00000003821	ENSMUSG00000025583	RPTOR
ENSRNOG00000003822	ENSMUSG00000020409	SLU7
ENSRNOG00000003825	ENSMUSG00000025995	WDR75
ENSRNOG00000003827	ENSMUSG00000041895	WIPI1
ENSRNOG00000003829	ENSMUSG00000024480	AP3S1
ENSRNOG00000003831	ENSMUSG00000021177	TDP1
ENSRNOG00000003832	ENSMUSG00000037568	VASH2
ENSRNOG00000003833	ENSMUSG00000037499	NENF
ENSRNOG00000003834	ENSMUSG00000033352	MAP2K4
ENSRNOG00000003835	ENSMUSG00000038178	SLC43A2
ENSRNOG00000003837	ENSMUSG00000020743	MIF4GD
ENSRNOG00000003840	ENSMUSG00000031558	SLIT2
ENSRNOG00000003841	ENSMUSG00000058248	KCNH1
ENSRNOG00000003844	ENSMUSG00000029169	DHX15
ENSRNOG00000003845	ENSMUSG00000000125	WNT3
ENSRNOG00000003846	ENSMUSG00000017781	PITPNA
ENSRNOG00000003847	ENSMUSG00000018415	GID4
ENSRNOG00000003848	ENSMUSG00000079487	MED12
ENSRNOG00000003849	ENSMUSG00000020903	STX8
ENSRNOG00000003853	ENSMUSG00000063253	SCOC
ENSRNOG00000003855	ENSMUSG00000004069	DNAJA3
ENSRNOG00000003858	ENSMUSG00000031007	ATP6AP2
ENSRNOG00000003860	ENSMUSG00000039824	MYL6B
ENSRNOG00000003861	ENSMUSG00000040124	GORAB
ENSRNOG00000003864	ENSMUSG00000019433	GIPC1
ENSRNOG00000003865	ENSMUSG00000020839	TMIGD1
ENSRNOG00000003866	ENSMUSG00000045382	CXCR4
ENSRNOG00000003869	ENSMUSG00000072941	SOD3
ENSRNOG00000003870	ENSMUSG00000046491	C1QTNF2
ENSRNOG00000003872	ENSMUSG00000025993	SLC40A1
ENSRNOG00000003873	ENSMUSG00000020841	CPD
ENSRNOG00000003875	ENSMUSG00000001173	OCRL
ENSRNOG00000003878	ENSMUSG00000042581	THSD7B
ENSRNOG00000003879	ENSMUSG00000040746	RNF167
ENSRNOG00000003880	ENSMUSG00000006764	TPH2
ENSRNOG00000003881	ENSMUSG00000013997	NIT1
ENSRNOG00000003882	ENSMUSG00000033671	CEP350
ENSRNOG00000003884	ENSMUSG00000026348	ACMSD
ENSRNOG00000003887	ENSMUSG00000039252	LGI2
ENSRNOG00000003888	ENSMUSG00000051079	RGS13
ENSRNOG00000003889	ENSMUSG00000020130	TBC1D15
ENSRNOG00000003890	ENSMUSG00000058799	NAP1L1
ENSRNOG00000003893	ENSMUSG00000044707	CCNJL
ENSRNOG00000003895	ENSMUSG00000026358	RGS1
ENSRNOG00000003897	ENSMUSG00000001506	COL1A1
ENSRNOG00000003899	ENSMUSG00000045545	KRT14
ENSRNOG00000003901	ENSMUSG00000020462	CFAP36
ENSRNOG00000003902	ENSMUSG00000020405	FABP6
ENSRNOG00000003905	ENSMUSG00000034187	NSF
ENSRNOG00000003917	ENSMUSG00000026558	UCK2
ENSRNOG00000003918	ENSMUSG00000020744	SLC25A19
ENSRNOG00000003919	ENSMUSG00000020516	RPS6KB1
ENSRNOG00000003923	ENSMUSG00000020132	RAB21
ENSRNOG00000003924	ENSMUSG00000029186	PI4K2B
ENSRNOG00000003925	ENSMUSG00000037375	HHAT
ENSRNOG00000003927	ENSMUSG00000026399	CD55
ENSRNOG00000003928	ENSMUSG00000052428	TMCO1
ENSRNOG00000003929	ENSMUSG00000051323	PCDH19
ENSRNOG00000003931	ENSMUSG00000020604	ARSG
ENSRNOG00000003936	ENSMUSG00000044950	PWWP2A
ENSRNOG00000003942	ENSMUSG00000026095	ASNSD1
ENSRNOG00000003946	ENSMUSG00000026466	TOR1AIP1
ENSRNOG00000003947	ENSMUSG00000020902	NTN1
ENSRNOG00000003948	ENSMUSG00000020536	LLGL1
ENSRNOG00000003949	ENSMUSG00000031295	PHKA2
ENSRNOG00000003950	ENSMUSG00000024481	LVRN
ENSRNOG00000003951	ENSMUSG00000021178	PSMC1
ENSRNOG00000003952	ENSMUSG00000051590	MAP3K19
ENSRNOG00000003953	ENSMUSG00000036104	RAB3GAP1
ENSRNOG00000003954	ENSMUSG00000031304	IL2RG
ENSRNOG00000003955	ENSMUSG00000021007	SPATA7
ENSRNOG00000003956	ENSMUSG00000031355	ARHGAP6
ENSRNOG00000003958	ENSMUSG00000042705	COMMD10
ENSRNOG00000003959	ENSMUSG00000026357	RGS18
ENSRNOG00000003964	ENSMUSG00000059586	NSMCE2
ENSRNOG00000003965	ENSMUSG00000031354	AMELX
ENSRNOG00000003967	ENSMUSG00000018171	VMP1
ENSRNOG00000003969	ENSMUSG00000020614	FAM20A
ENSRNOG00000003970	ENSMUSG00000031691	TNPO2
ENSRNOG00000003971	ENSMUSG00000010392	GOSR1
ENSRNOG00000003972	ENSMUSG00000020963	TSHR
ENSRNOG00000003973	ENSMUSG00000026456	CYB5R1
ENSRNOG00000003977	ENSMUSG00000024190	DUSP1
ENSRNOG00000003979	ENSMUSG00000036086	ZRANB3
ENSRNOG00000003980	ENSMUSG00000041278	TTC1
ENSRNOG00000003981	ENSMUSG00000018347	ZNF18
ENSRNOG00000003983	ENSMUSG00000006412	PFDN2
ENSRNOG00000003984	ENSMUSG00000037010	APLN
ENSRNOG00000003985	ENSMUSG00000069520	TMEM19
ENSRNOG00000003988	ENSMUSG00000020657	DNAJC27
ENSRNOG00000003990	ENSMUSG00000059923	GRB2
ENSRNOG00000003991	ENSMUSG00000039342	ANKAR
ENSRNOG00000003992	ENSMUSG00000046207	PIK3R6
ENSRNOG00000003993	ENSMUSG00000020137	THAP2
ENSRNOG00000003997	ENSMUSG00000055214	PLD5
ENSRNOG00000003998	ENSMUSG00000001508	SGCA
ENSRNOG00000003999	ENSMUSG00000020654	ADCY3
ENSRNOG00000004000	ENSMUSG00000046909	TEFM
ENSRNOG00000004001	ENSMUSG00000026096	OSGEPL1
ENSRNOG00000004003	ENSMUSG00000039384	DUSP10
ENSRNOG00000004004	ENSMUSG00000021179	NRDE2
ENSRNOG00000004006	ENSMUSG00000014905	DNAJB9
ENSRNOG00000004009	ENSMUSG00000037005	XPNPEP2
ENSRNOG00000004011	ENSMUSG00000019988	NEDD1
ENSRNOG00000004013	ENSMUSG00000034813	GRIP1
ENSRNOG00000004014	ENSMUSG00000025371	CHMP6
ENSRNOG00000004016	ENSMUSG00000031358	MSL3
ENSRNOG00000004018	ENSMUSG00000060985	TDRD5
ENSRNOG00000004019	ENSMUSG00000020205	PHLDA1
ENSRNOG00000004022	ENSMUSG00000045259	KLHDC9
ENSRNOG00000004026	ENSMUSG00000019943	ATP2B1
ENSRNOG00000004027	ENSMUSG00000026687	ALDH9A1
ENSRNOG00000004029	ENSMUSG00000006411	NECTIN4
ENSRNOG00000004030	ENSMUSG00000026602	NPHS2
ENSRNOG00000004032	ENSMUSG00000020747	TMEM94
ENSRNOG00000004033	ENSMUSG00000019647	SEMA6A
ENSRNOG00000004035	ENSMUSG00000063334	KRR1
ENSRNOG00000004036	ENSMUSG00000046032	SNX12
ENSRNOG00000004040	ENSMUSG00000020620	ABCA8
ENSRNOG00000004048	ENSMUSG00000036273	LRRK2
ENSRNOG00000004049	ENSMUSG00000025372	BAIAP2
ENSRNOG00000004050	ENSMUSG00000038145	SNRK
ENSRNOG00000004057	ENSMUSG00000032740	CCDC88A
ENSRNOG00000004059	ENSMUSG00000096199	PTRHD1
ENSRNOG00000004060	ENSMUSG00000001175	CALM1
ENSRNOG00000004061	ENSMUSG00000020994	PNN
ENSRNOG00000004062	ENSMUSG00000026405	C4BPA
ENSRNOG00000004063	ENSMUSG00000040711	SH3PXD2B
ENSRNOG00000004067	ENSMUSG00000020598	NRCAM
ENSRNOG00000004068	ENSMUSG00000020647	NCOA1
ENSRNOG00000004072	ENSMUSG00000017774	MYO1C
ENSRNOG00000004075	ENSMUSG00000045915	CCDC42
ENSRNOG00000004076	ENSMUSG00000026098	PMS1
ENSRNOG00000004077	ENSMUSG00000035681	KCNC2
ENSRNOG00000004078	ENSMUSG00000060600	ENO3
ENSRNOG00000004083	ENSMUSG00000021012	ZC3H14
ENSRNOG00000004085	ENSMUSG00000046603	TCAIM
ENSRNOG00000004089	ENSMUSG00000022425	ENPP2
ENSRNOG00000004091	ENSMUSG00000018541	CWC25
ENSRNOG00000004093	ENSMUSG00000017686	RHOT1
ENSRNOG00000004094	ENSMUSG00000019464	PTGER1
ENSRNOG00000004099	ENSMUSG00000056211	R3HDM1
ENSRNOG00000004100	ENSMUSG00000032501	TRIB1
ENSRNOG00000004103	ENSMUSG00000020993	TRAPPC6B
ENSRNOG00000004104	ENSMUSG00000063488	ZKSCAN7
ENSRNOG00000004107	ENSMUSG00000071415	RPL23
ENSRNOG00000004109	ENSMUSG00000022306	ZFPM2
ENSRNOG00000004110	ENSMUSG00000020601	TRIB2
ENSRNOG00000004111	ENSMUSG00000026600	SOAT1
ENSRNOG00000004112	ENSMUSG00000020434	C5orf52
ENSRNOG00000004117	ENSMUSG00000022342	KCNV1
ENSRNOG00000004118	ENSMUSG00000049176	FRMPD4
ENSRNOG00000004120	ENSMUSG00000083695	RNF138
ENSRNOG00000004122	ENSMUSG00000040680	KREMEN2
ENSRNOG00000004124	ENSMUSG00000031364	GRPR
ENSRNOG00000004127	ENSMUSG00000057335	CEP170
ENSRNOG00000004130	ENSMUSG00000029176	ANAPC4
ENSRNOG00000004131	ENSMUSG00000057672	PKN1
ENSRNOG00000004132	ENSMUSG00000038366	LASP1
ENSRNOG00000004133	ENSMUSG00000031297	SLC7A3
ENSRNOG00000004135	ENSMUSG00000032551	KIAA1143
ENSRNOG00000004137	ENSMUSG00000044949	UBTD2
ENSRNOG00000004139	ENSMUSG00000018736	NDEL1
ENSRNOG00000004140	ENSMUSG00000029089	PACRGL
ENSRNOG00000004141	ENSMUSG00000039646	VASN
ENSRNOG00000004142	ENSMUSG00000044056	EFCAB9
ENSRNOG00000004143	ENSMUSG00000026457	ADIPOR1
ENSRNOG00000004146	ENSMUSG00000039637	CORO7-PAM16
ENSRNOG00000004148	ENSMUSG00000020015	CDK17
ENSRNOG00000004149	ENSMUSG00000019888	MGAT4C
ENSRNOG00000004150	ENSMUSG00000037341	SLC9A7
ENSRNOG00000004152	ENSMUSG00000022305	LRP12
ENSRNOG00000004155	ENSMUSG00000047181	SAMD14
ENSRNOG00000004158	ENSMUSG00000004698	HDAC9
ENSRNOG00000004159	ENSMUSG00000002812	FLII
ENSRNOG00000004160	ENSMUSG00000025742	PRPS2
ENSRNOG00000004161	ENSMUSG00000020459	MTIF2
ENSRNOG00000004162	ENSMUSG00000026409	PFKFB2
ENSRNOG00000004163	ENSMUSG00000059291	RPL11
ENSRNOG00000004165	ENSMUSG00000002688	PRKD1
ENSRNOG00000004168	ENSMUSG00000048807	SLC35E4
ENSRNOG00000004169	ENSMUSG00000020235	FZR1
ENSRNOG00000004171	ENSMUSG00000056752	DNAH9
ENSRNOG00000004172	ENSMUSG00000038967	PDK2
ENSRNOG00000004177	ENSMUSG00000025401	MYO1A
ENSRNOG00000004179	ENSMUSG00000019890	NTS
ENSRNOG00000004181	ENSMUSG00000026504	SDCCAG8
ENSRNOG00000004183	ENSMUSG00000019897	CCDC59
ENSRNOG00000004185	ENSMUSG00000034602	MON2
ENSRNOG00000004186	ENSMUSG00000020590	SNX13
ENSRNOG00000004188	ENSMUSG00000047281	SFN
ENSRNOG00000004189	ENSMUSG00000020228	HELB
ENSRNOG00000004192	ENSMUSG00000048865	ARHGAP30
ENSRNOG00000004193	ENSMUSG00000026455	KLHL12
ENSRNOG00000004195	ENSMUSG00000037474	DTL
ENSRNOG00000004197	ENSMUSG00000031204	ASB12
ENSRNOG00000004198	ENSMUSG00000046314	STXBP6
ENSRNOG00000004200	ENSMUSG00000022340	SYBU
ENSRNOG00000004201	ENSMUSG00000037386	RIMS2
ENSRNOG00000004205	ENSMUSG00000024247	PKDCC
ENSRNOG00000004206	ENSMUSG00000021102	GLRX5
ENSRNOG00000004207	ENSMUSG00000051166	EML5
ENSRNOG00000004208	ENSMUSG00000024074	CRIM1
ENSRNOG00000004210	ENSMUSG00000048387	OSR1
ENSRNOG00000004212	ENSMUSG00000008167	FBXW9
ENSRNOG00000004216	ENSMUSG00000034883	LRR1
ENSRNOG00000004217	ENSMUSG00000020272	STK10
ENSRNOG00000004218	ENSMUSG00000020948	KLHL28
ENSRNOG00000004219	ENSMUSG00000060038	DHPS
ENSRNOG00000004220	ENSMUSG00000022339	EBAG9
ENSRNOG00000004221	ENSMUSG00000020140	LGR5
ENSRNOG00000004222	ENSMUSG00000040808	S100G
ENSRNOG00000004226	ENSMUSG00000020227	IRAK3
ENSRNOG00000004229	ENSMUSG00000025400	TAC3
ENSRNOG00000004232	ENSMUSG00000035293	G2E3
ENSRNOG00000004234	ENSMUSG00000043998	MGAT2
[truncated: 15,827 more rows]
